# Supplementary material for: DNA Barcoding the Canadian Arctic Flora: Core Plastid Barcodes (rbcL + matK) for 490 Vascular Plant Species
Source: PubMed Central journal article supplement (PMC3865322; doi:10.1371/journal.pone.0077982), 2013-10-22

## Ericaceae

FCA2024-11|Consaul\_3540\_CAN|Empetrum\_nigrum (A) rbcL

FCA765-10|Gillespie\_8833|Empetrum\_nigrum

FCA2336-11|Aiken\_97-005\_CAN|Empetrum\_nigrum

FCA1671-11|Mallory\_sn\_CAN585773|Empetrum\_nigrum

FCA2337-11|Brunton\_10555\_CAN|Empetrum\_nigrum

FCA2578-11|Saarela\_1518\_CAN|Empetrum\_nigrum

FCA132-09|Gillespie\_et\_al\_7968|Empetrum\_nigrum

FCA2335-11|Pokiak\_44\_CAN|Empetrum\_nigrum

FCA307-10|Burt\_s.n.\_CAN593352|Empetrum\_nigrum

FCA1659-11|Aiken\_04-017\_CAN|Phyllodoce\_caerulea

FCA2092-11|Consaul\_3809\_CAN|Phyllodoce\_caerulea

FCA1661-11|Aiken\_02-014a\_CAN|Phyllodoce\_caerulea

FCA1660-11|Aiken\_04-025\_CAN|Phyllodoce\_caerulea

FCA2016-11|Consaul\_3514\_CAN|Kalmia\_procumbens

FCA298-10|Boles\_RB00-4|Kalmia\_procumbens

FCA1559-11|Consaul\_2362a\_CAN|Kalmia\_procumbens

FCA2017-11|Consaul\_3515\_CAN|Rhododendron\_lapponicum

FCA587-10|Gillespie\_8534|Rhododendron\_lapponicum

FCA003-09|Gillespie\_et\_al\_7428|Rhododendron\_lapponicum

FCA2765-11|Gillespie\_9803\_CAN|Rhododendron\_lapponicum

FCA853-10|Gillespie\_9092|Rhododendron\_lapponicum

FCA267-09|Burt\_s.n.\_CAN593336|Rhododendron\_tomentosum\_ssp\_decumbens

FCA2592-11|Saarela\_1532\_CAN|Rhododendron\_tomentosum\_ssp\_decumbens

FCA118-09|Gillespie\_et\_al\_7849|Rhododendron\_tomentosum\_ssp\_decumbens

FCA2085-11|Consaul\_3790a\_CAN|Rhododendron\_tomentosum\_ssp\_decumbens

FCA2532-11|Saarela\_1472\_CAN|Cassiope\_tetragona

FCA115-09|Gillespie\_et\_al\_7831|Cassiope\_tetragona

FCA277-09|Burt\_s.n.\_CAN593355|Cassiope\_tetragona

FCA2346-11|Pokiak\_21\_CAN|Cassiope\_tetragona

FCA2347-11|Aiken\_99-049\_CAN|Cassiope\_tetragona

FCA2055-11|Consaul\_3674\_CAN|Cassiope\_tetragona

FCA2666-11|Gillespie\_9497\_CAN|Cassiope\_tetragona

FCA588-10|Gillespie\_8535|Cassiope\_tetragona

FCA2348-11|Aiken\_97-006\_CAN|Cassiope\_tetragona

FCA2344-11|Gillespie\_6718\_CAN|Harrimanella\_hypnoides

FCA1936-11|Consaul\_3973\_CAN|Harrimanella\_hypnoides

FCA1551-11|Aiken\_04-026\_CAN|Harrimanella\_hypnoides

FCA1550-11|Aiken\_04-081\_CAN|Harrimanella\_hypnoides

FCA1552-11|Ohenoja\_57\_CAN|Harrimanella\_hypnoides

FCA1666-11|Elven\_3268-99\_CAN|Vaccinium\_uliginosum

FCA2583-11|Saarela\_1523\_CAN|Vaccinium\_uliginosum

FCA1664-11|Gillespie\_6715\_CAN|Vaccinium\_uliginosum

FCA283-09|Burt\_s.n.\_CAN593363|Vaccinium\_vitis-idaea\_ssp\_minus

FCA147-09|Gillespie\_et\_al\_8037|Vaccinium\_vitis-idaea\_ssp\_minus

FCA1667-11|Aiken\_02-002b\_CAN|Vaccinium\_vitis-idaea\_ssp\_minus

FCA1967-11|Consaul\_4128\_CAN|Vaccinium\_vitis-idaea\_ssp\_minus

FCA2342-11|Aiken\_97-046\_CAN|Vaccinium\_vitis-idaea\_ssp\_minus

FCA2341-11|Pokiak\_45\_CAN|Vaccinium\_vitis-idaea\_ssp\_minus

FCA117-09|Gillespie\_et\_al\_7848|Vaccinium\_uliginosum

FCA2015-11|Consaul\_3509\_CAN|Vaccinium\_uliginosum

FCA678-10|Gillespie\_8667|Vaccinium\_uliginosum

FCA2761-11|Gillespie\_9796\_CAN|Vaccinium\_uliginosum

FCA1663-11|Hurst\_6\_CAN|Vaccinium\_uliginosum

FCA726-10|Gillespie\_8755|Vaccinium\_uliginosum

FCA140-09|Gillespie\_et\_al\_8002|Andromeda\_polifolia

FCA2057-11|Consaul\_3679\_CAN|Andromeda\_polifolia

FCA623-10|Gillespie\_8575|Andromeda\_polifolia

FCA2349-11|Brunton\_9923\_CAN|Arctous\_alpina

FCA2350-11|Aiken\_89-062\_CAN|Arctous\_alpina

FCA091-09|Gillespie\_et\_al\_7714|Arctous\_rubra

FCA2577-11|Saarela\_1517\_CAN|Arctous\_rubra

FCA2098-11|Consaul\_3825\_CAN|Arctous\_rubra

FCA2351-11|Aiken\_99-050\_CAN|Arctous\_rubra

FCA601-10|Gillespie\_8550|Arctous\_rubra

FCA705-10|Gillespie\_8721|Arctous\_rubra

FCA2760-11|Gillespie\_9794\_CAN|Arctous\_rubra

FCA1548-11|Gillespie\_7193\_CAN|Arctous\_rubra

FCA2622-11|Saarela\_1562\_CAN|Arctostaphylos\_uva-ursi

FCA2579-11|Saarela\_1519\_CAN|Arctostaphylos\_uva-ursi

FCA2355-11|Brunton\_10564\_CAN|Orthilia\_secunda

FCA700-10|Gillespie\_8712|Orthilia\_secunda

FCA2582-11|Saarela\_1522\_CAN|Orthilia\_secunda

FCA834-10|Gillespie\_9030|Orthilia\_secunda

FCA2759-11|Gillespie\_9793\_CAN|Orthilia\_secunda

FCA2354-11|Edlund\_1\_CAN|Orthilia\_secunda

FCA312-10|Burt\_s.n.\_CAN593371|Orthilia\_secunda

FCA146-09|Gillespie\_et\_al\_8036|Orthilia\_secunda

FCA2353-11|Aiken\_87-171\_CAN|Orthilia\_secunda

FCA1931-11|Consaul\_3946\_CAN|Orthilia\_secunda

FCA756-10|Gillespie\_8809|Pyrola\_grandiflora

FCA697-10|Gillespie\_8707|Pyrola\_grandiflora

FCA274-09|Burt\_s.n.\_CAN593350|Pyrola\_grandiflora

FCA2352-11|Hedderson\_5988\_CAN|Pyrola\_grandiflora

FCA1543-11|Elven\_3579-9\_CAN|Pyrola\_grandiflora

FCA1544-11|Brysting\_01-051\_CAN|Pyrola\_grandiflora

FCA2768-11|Gillespie\_9808\_CAN|Pyrola\_grandiflora

FCA2074-11|Consaul\_3737\_CAN|Pyrola\_grandiflora

0.0060

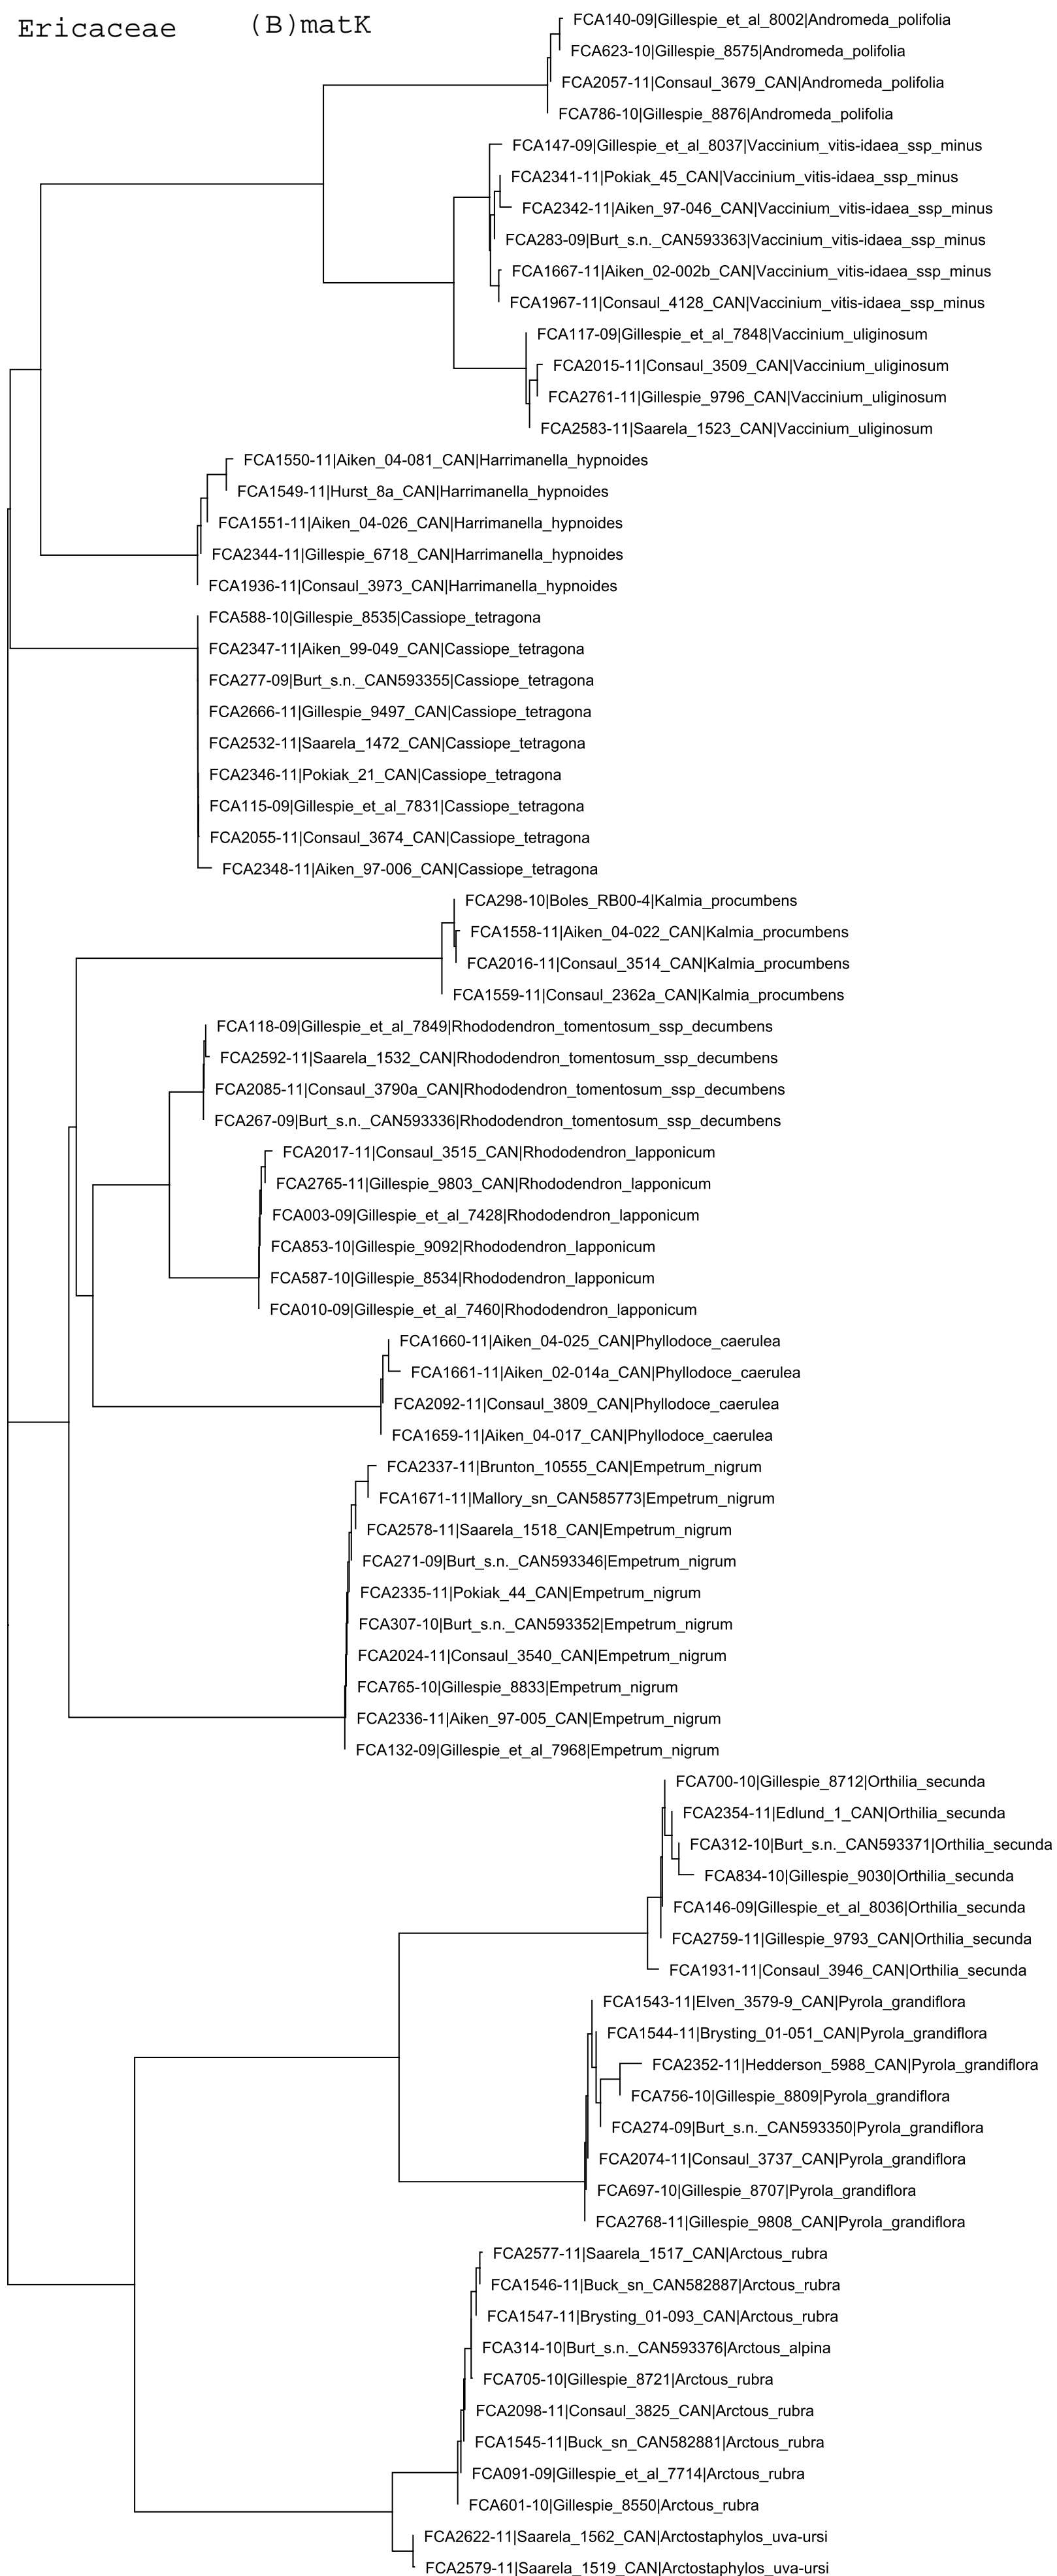

## Ericaceae (C)rbcL + matK

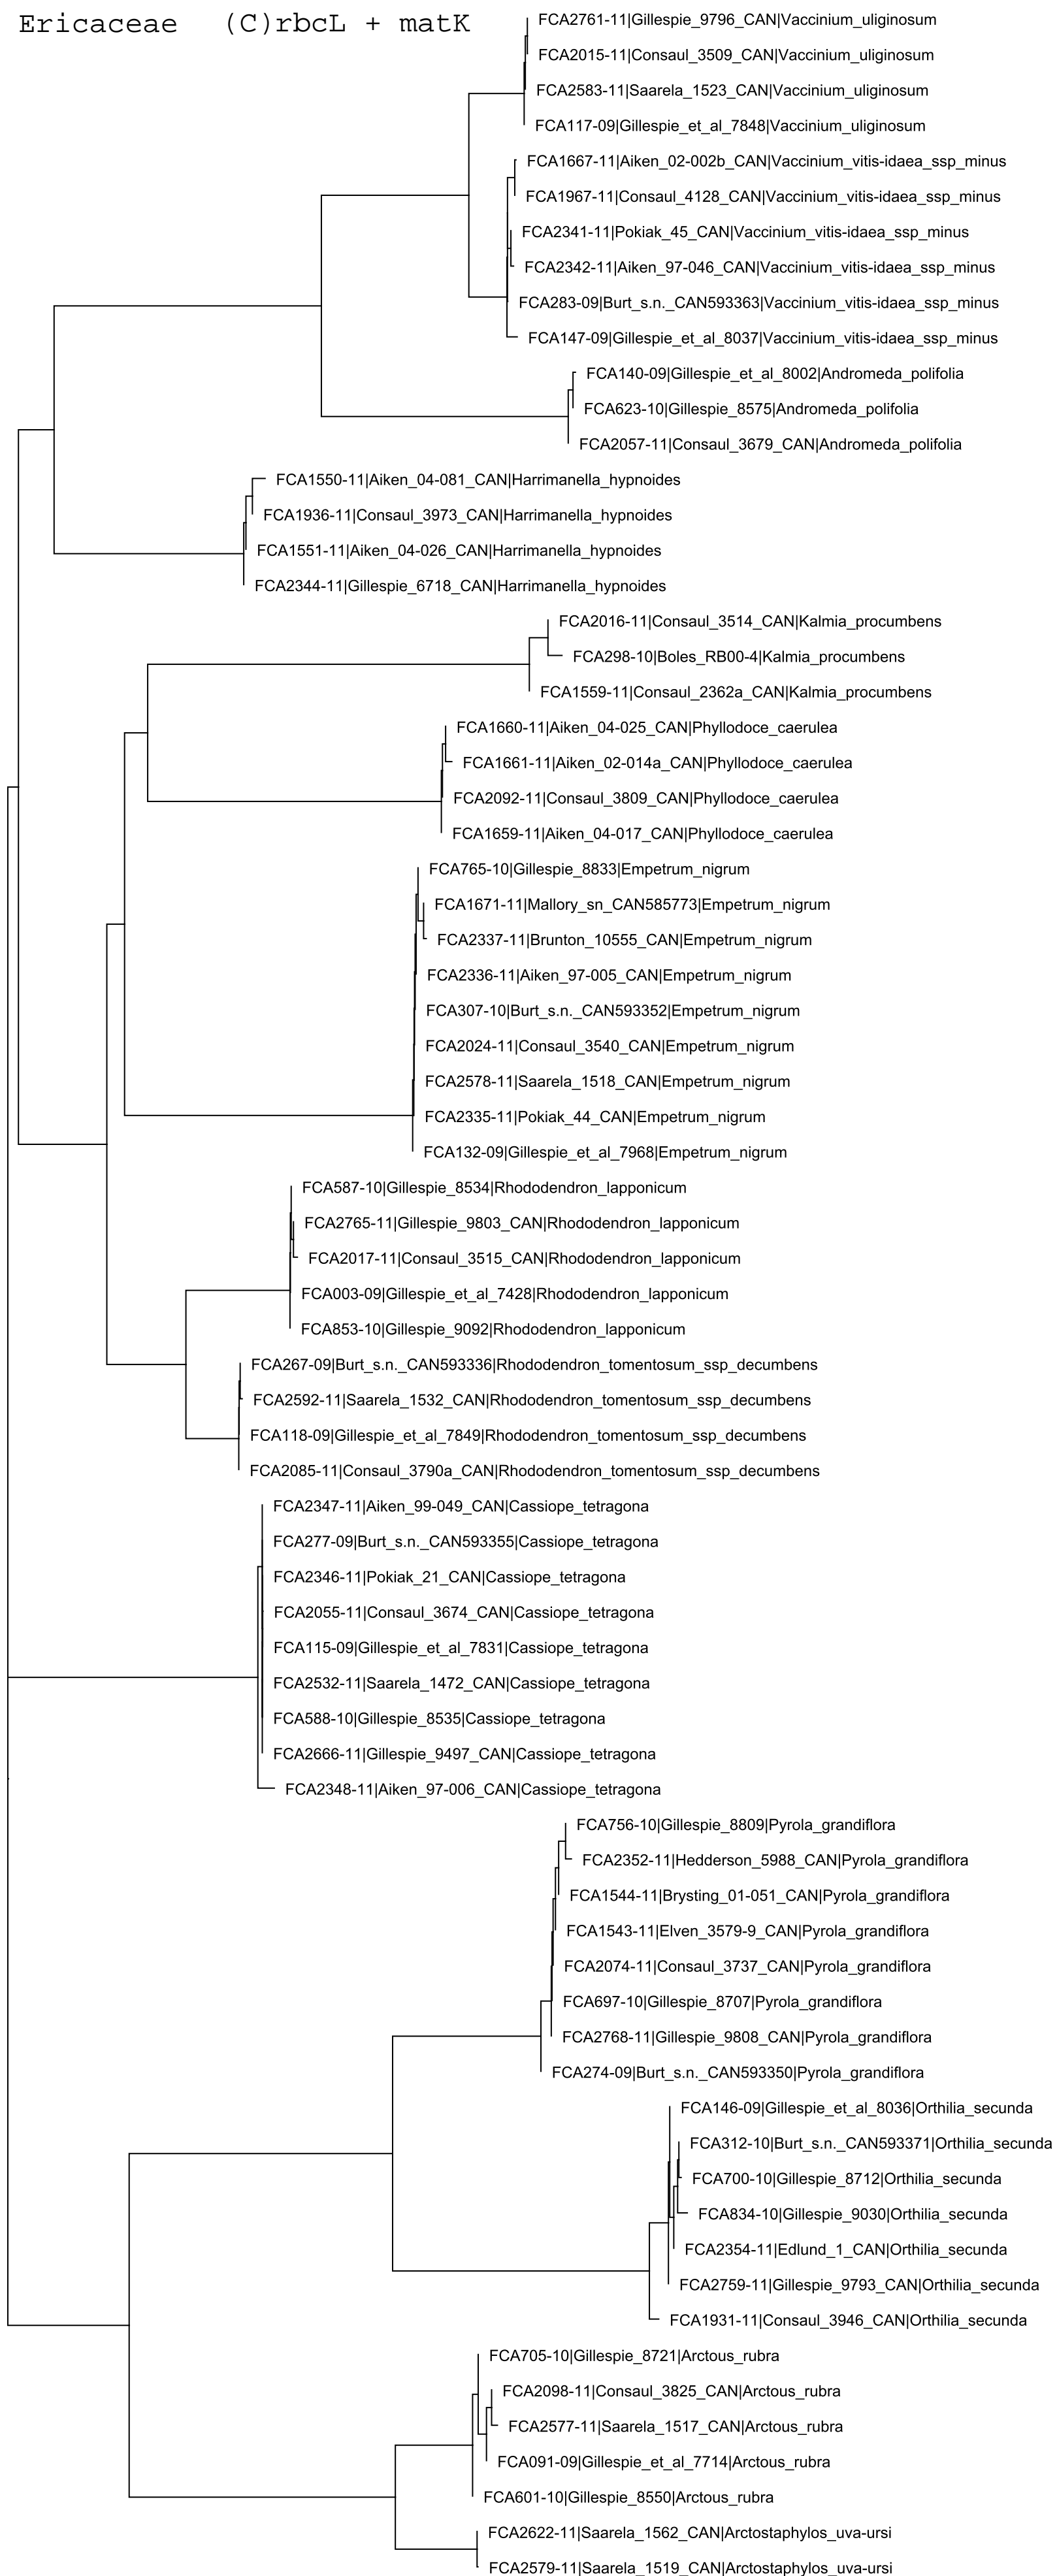

Supplement: pone.0077982.s023.pdf [file pone.0077982.s023.pdf]
