# Supplementary material for: DNA Barcoding the Canadian Arctic Flora: Core Plastid Barcodes (rbcL + matK) for 490 Vascular Plant Species
Source: PubMed Central journal article supplement (PMC3865322; doi:10.1371/journal.pone.0077982), 2013-10-22
Supplement: pone.0077982.s012.pdf [file pone.0077982.s012.pdf]

# Boraginaceae

matK

FCA1914-11|Elven\_2425-99\_CAN|Mertensia\_maritima\_ssp\_tenella

FCA1912-11|Aiken\_04-087\_CAN|Mertensia\_maritima\_ssp\_tenella

FCA2032-11|Consaul\_3583\_CAN|Mertensia\_maritima\_ssp\_tenella

FCA1913-11|Buck\_sn\_CAN582880|Mertensia\_maritima\_ssp\_tenella

FCA2529-11|Saarela\_1469\_CAN|Mertensia\_maritima\_ssp\_tenella

FCA2187-11|Cooper\_1343\_CAN|Eritrichium\_aretioides

FCA1907-11|Elven\_2208\_CAN|Myosotis\_alpestris\_ssp\_asiatica

FCA2193-11|Aiken\_88-231\_CAN|Myosotis\_alpestris\_ssp\_asiatica

FCA2192-11|Aiken\_87-104\_CAN|Myosotis\_alpestris\_ssp\_asiatica

FCA2195-11|Consaul\_878\_CAN|Myosotis\_alpestris\_ssp\_asiatica

FCA2194-11|Aiken\_88-112\_CAN|Myosotis\_alpestris\_ssp\_asiatica

0.0070
