# Supplementary material for: DNA Barcoding the Canadian Arctic Flora: Core Plastid Barcodes (rbcL + matK) for 490 Vascular Plant Species
Source: PubMed Central journal article supplement (PMC3865322; doi:10.1371/journal.pone.0077982), 2013-10-22

# Diapensiaceae

FCA1668-11|Aiken\_02-063\_CAN|Diapensia\_lapponica  
FCA1669-11|Elven\_3587-9\_CAN|Diapensia\_lapponica  
FCA1670-11|Aiken\_02-002f\_CAN|Diapensia\_lapponica  
FCA2340-11|Brunton\_9898\_CAN|Diapensia\_lapponica  
FCA2339-11|Brunton\_10573\_CAN|Diapensia\_lapponica  
FCA2058-11|Consaul\_3685\_CAN|Diapensia\_lapponica

(A) rbcL

E-307

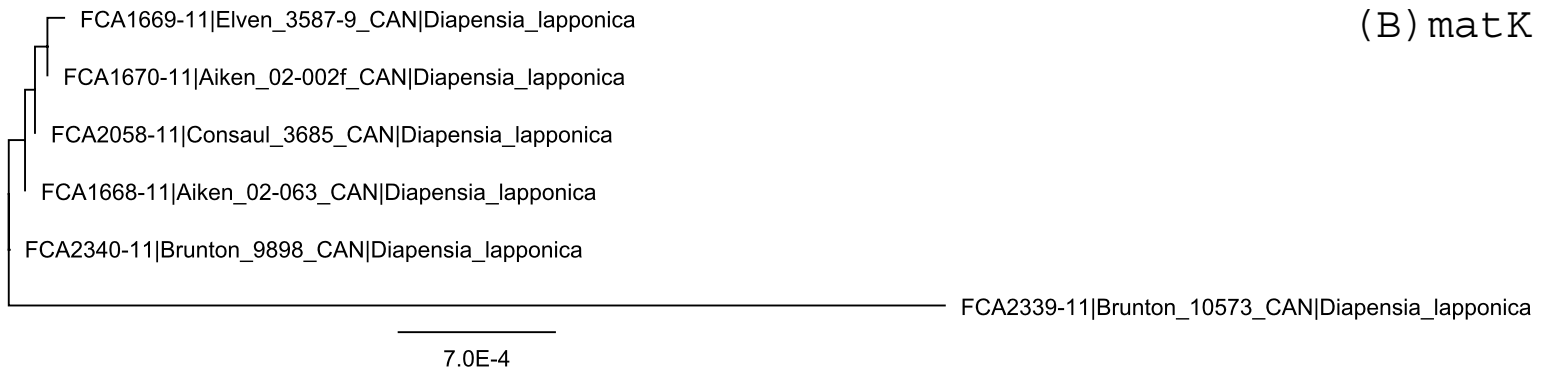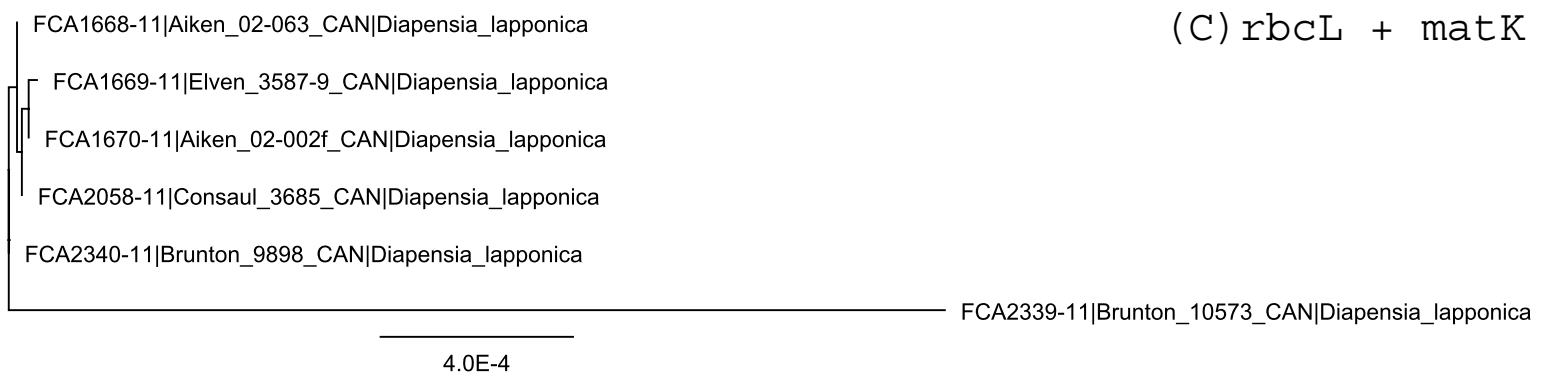

Supplement: pone.0077982.s019.pdf [file pone.0077982.s019.pdf]
