# Supplementary material for: DNA Barcoding the Canadian Arctic Flora: Core Plastid Barcodes (rbcL + matK) for 490 Vascular Plant Species
Source: PubMed Central journal article supplement (PMC3865322; doi:10.1371/journal.pone.0077982), 2013-10-22
Supplement: pone.0077982.s021.pdf [file pone.0077982.s021.pdf]

# Elaeagnaceae

FCA2575-11|KC484093|Saarela\_1515\_CAN|Shepherdia\_canadensis

(A) rbcL

FCA2073-11|KC484094|Consaul\_3723\_CAN|Shepherdia\_canadensis

FCA655-10|KC484095|Gillespie\_8626|Shepherdia\_canadensis

E-307

FCA2575-11|KC475872|Saarela\_1515\_CAN|Shepherdia\_canadensis

(B) matK

FCA2073-11|KC475873|Consaul\_3723\_CAN|Shepherdia\_canadensis

FCA655-10|KC475874|Gillespie\_8626|Shepherdia\_canadensis

E-307

FCA2575-11|Saarela\_1515\_CAN|Shepherdia\_canadensis

(C) rbcL + matK

FCA2073-11|Consaul\_3723\_CAN|Shepherdia\_canadensis

FCA655-10|Gillespie\_8626|Shepherdia\_canadensis

E-307
