# Supplementary material for: DNA Barcoding the Canadian Arctic Flora: Core Plastid Barcodes (rbcL + matK) for 490 Vascular Plant Species
Source: PubMed Central journal article supplement (PMC3865322; doi:10.1371/journal.pone.0077982), 2013-10-22
Supplement: pone.0077982.s030.pdf [file pone.0077982.s030.pdf]

FCA750-10|KC483093|Gillespie\_8800|Linum\_lewisii\_ssp\_lewisii

Linaceae

rbcL

FCA2728-11|KC483092|Gillespie\_9730\_CAN|Linum\_lewisii\_ssp\_lewisii

FCA811-10|KC483094|Gillespie\_8944|Linum\_lewisii\_ssp\_lewisii
