# Supplementary material for: DNA Barcoding the Canadian Arctic Flora: Core Plastid Barcodes (rbcL + matK) for 490 Vascular Plant Species
Source: PubMed Central journal article supplement (PMC3865322; doi:10.1371/journal.pone.0077982), 2013-10-22
Supplement: pone.0077982.s038.pdf [file pone.0077982.s038.pdf]

Papaveraceae (A) rbcL

FCA2792-11|Gillespie\_9846\_CAN|Papaver\_dahlianum  
 FCA420-10|Gillespie\_6725|Papaver\_dahlianum  
 FCA2435-11|Bennett\_08-141\_CAN|Papaver\_mcconnellii  
 FCA2160-11|Murray\_10361\_CAN|Papaver\_dahlianum  
 FCA2162-11|Gillespie\_6075\_CAN|Papaver\_cornwallisense  
 FCA2705-11|Gillespie\_9693\_CAN|Papaver\_lapponicum\_ssp\_occidentale  
 FCA2936-11|Gillespie\_10254\_CAN|Papaver\_cornwallisense  
 FCA2851-11|Gillespie\_9962\_CAN|Papaver\_dahlianum  
 FCA2937-11|Gillespie\_10257\_CAN|Papaver\_hultenii  
 FCA2890-11|Gillespie\_10090\_CAN|Papaver\_cornwallisense  
 FCA2846-11|Gillespie\_9950\_CAN|Papaver\_cornwallisense  
 FCA2674-11|Gillespie\_9524\_CAN|Papaver\_hultenii  
 FCA090-09|Gillespie\_et\_al\_7713|Papaver\_hultenii  
 FCA2436-11|Bennett\_05-0995\_CAN|Papaver\_mcconnellii  
 FCA418-10|Gillespie\_6106|Papaver\_dahlianum  
 FCA3044-11|Welsh\_11992\_CAN|Papaver\_mcconnellii  
 FCA2161-11|Elven\_2343-9\_CAN|Papaver\_hultenii  
 FCA421-10|Gillespie\_6900-1|Papaver\_dahlianum  
 FCA416-10|Gillespie\_6536|Papaver\_dahlianum  
 FCA424-10|Gillespie\_6815-1|Papaver\_dahlianum  
 FCA419-10|Gillespie\_6982-2|Papaver\_dahlianum  
 FCA2163-11|Gillett\_18194\_CAN|Papaver\_cornwallisense  
 FCA2863-11|Gillespie\_10008\_CAN|Papaver\_hultenii  
 FCA580-10|Gillespie\_8526|Papaver\_hultenii  
 FCA2166-11|Edlund\_12806\_CAN|Papaver\_cf.\_lapponicum  
 FCA2839-11|Gillespie\_9931\_CAN|Papaver\_hultenii  
 FCA2706-11|Gillespie\_9694\_CAN|Papaver\_dahlianum  
 FCA2788-11|Gillespie\_9840\_CAN|Papaver\_cornwallisense  
 FCA2704-11|Gillespie\_9692\_CAN|Papaver\_cornwallisense  
 FCA2525-11|Saarela\_1465\_CAN|Papaver\_dahlianum  
 FCA2167-11|Murray\_10360\_CAN|Papaver\_lapponicum  
 FCA2164-11|Aiken\_99-065\_CAN|Papaver\_cornwallisense  
 FCA068-09|Gillespie\_et\_al\_7624|Papaver\_hultenii  
 FCA2686-11|Gillespie\_9636\_CAN|Papaver\_cornwallisense

FCA415-10|Gillespie\_6601-1|Papaver\_dahlianum  
 FCA2797-11|Gillespie\_9854\_CAN|Papaver\_lapponicum\_ssp\_occidentale  
 FCA423-10|Gillespie\_6955-1|Papaver\_dahlianum  
 FCA2795-11|Gillespie\_9850\_CAN|Papaver\_hultenii  
 FCA186-09|Gillespie\_et\_al\_8482|Papaver\_sp.  
 FCA417-10|Gillespie\_6628|Papaver\_dahlianum  
 FCA185-09|Gillespie\_et\_al\_8481b|Papaver\_sp.  
 FCA217-09|Bosquet\_12|Papaver\_dahlianum  
 FCA456-10|Gillespie\_et\_al\_7292-2|Papaver\_cornwallisense  
 FCA2779-11|Gillespie\_9828\_CAN|Papaver\_hultenii

Papaveraceae (B) matK

FCA2686-11|Gillespie\_9636\_CAN|Papaver\_cornwallisense  
 FCA2164-11|Aiken\_99-065\_CAN|Papaver\_cornwallisense  
 FCA2163-11|Gillett\_18194\_CAN|Papaver\_cornwallisense  
 FCA424-10|Gillespie\_6815-1|Papaver\_dahlianum  
 FCA2706-11|Gillespie\_9694\_CAN|Papaver\_dahlianum  
 FCA2704-11|Gillespie\_9692\_CAN|Papaver\_cornwallisense  
 FCA2788-11|Gillespie\_9840\_CAN|Papaver\_cornwallisense  
 FCA2851-11|Gillespie\_9962\_CAN|Papaver\_dahlianum  
 FCA2679-11|Gillespie\_9573\_CAN|Papaver\_lapponicum\_ssp\_occidentale  
 FCA2166-11|Edlund\_12806\_CAN|Papaver\_cf.\_lapponicum  
 FCA090-09|Gillespie\_et\_al\_7713|Papaver\_hultenii  
 FCA2792-11|Gillespie\_9846\_CAN|Papaver\_dahlianum  
 FCA2936-11|Gillespie\_10254\_CAN|Papaver\_cornwallisense  
 FCA2890-11|Gillespie\_10090\_CAN|Papaver\_cornwallisense

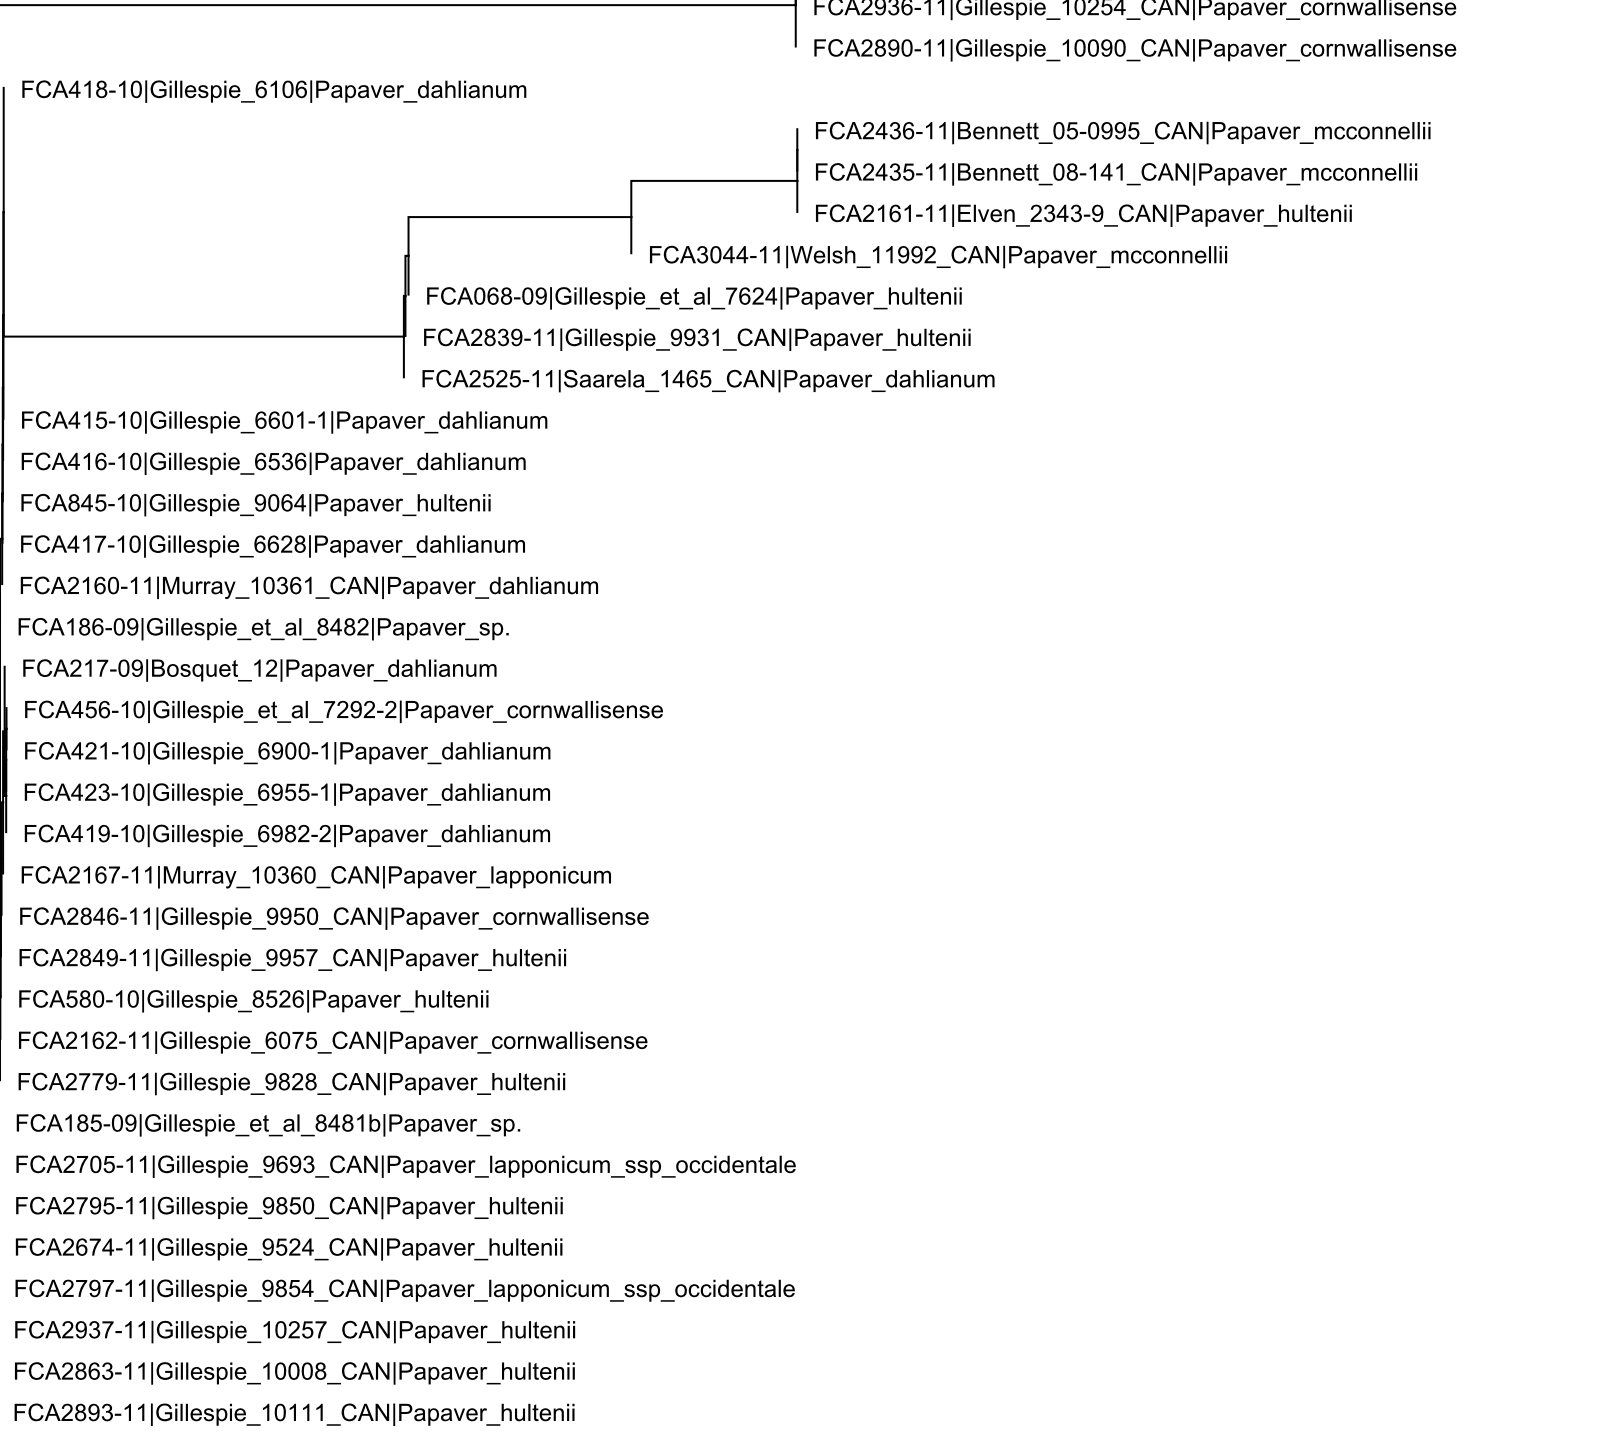

Papaveraceae (C)rbcL + matK

FCA424-10|Gillespie\_6815-1|Papaver\_dahlianum  
 FCA2163-11|Gillett\_18194\_CAN|Papaver\_cornwallisense  
 FCA2164-11|Aiken\_99-065\_CAN|Papaver\_cornwallisense  
 FCA2851-11|Gillespie\_9962\_CAN|Papaver\_dahlianum  
 FCA2890-11|Gillespie\_10090\_CAN|Papaver\_cornwallisense  
 FCA2936-11|Gillespie\_10254\_CAN|Papaver\_cornwallisense  
 FCA2706-11|Gillespie\_9694\_CAN|Papaver\_dahlianum  
 FCA090-09|Gillespie\_et\_al\_7713|Papaver\_hultenii  
 FCA2686-11|Gillespie\_9636\_CAN|Papaver\_cornwallisense  
 FCA2166-11|Edlund\_12806\_CAN|Papaver\_cf.\_lapponicum  
 FCA2788-11|Gillespie\_9840\_CAN|Papaver\_cornwallisense  
 FCA2792-11|Gillespie\_9846\_CAN|Papaver\_dahlianum  
 FCA2704-11|Gillespie\_9692\_CAN|Papaver\_cornwallisense

FCA421-10|Gillespie\_6900-1|Papaver\_dahlianum  
 FCA419-10|Gillespie\_6982-2|Papaver\_dahlianum  
 FCA2167-11|Murray\_10360\_CAN|Papaver\_lapponicum  
 FCA2937-11|Gillespie\_10257\_CAN|Papaver\_hultenii  
 FCA2674-11|Gillespie\_9524\_CAN|Papaver\_hultenii

FCA2525-11|Saarela\_1465\_CAN|Papaver\_dahlianum  
 FCA2161-11|Elven\_2343-9\_CAN|Papaver\_hultenii  
 FCA2435-11|Bennett\_08-141\_CAN|Papaver\_mcconnellii  
 FCA2436-11|Bennett\_05-0995\_CAN|Papaver\_mcconnellii  
 FCA3044-11|Welsh\_11992\_CAN|Papaver\_mcconnellii  
 FCA068-09|Gillespie\_et\_al\_7624|Papaver\_hultenii  
 FCA2839-11|Gillespie\_9931\_CAN|Papaver\_hultenii

FCA416-10|Gillespie\_6536|Papaver\_dahlianum  
 FCA2160-11|Murray\_10361\_CAN|Papaver\_dahlianum  
 FCA418-10|Gillespie\_6106|Papaver\_dahlianum  
 FCA2705-11|Gillespie\_9693\_CAN|Papaver\_lapponicum\_ssp\_occidentale  
 FCA2162-11|Gillespie\_6075\_CAN|Papaver\_cornwallisense  
 FCA2846-11|Gillespie\_9950\_CAN|Papaver\_cornwallisense  
 FCA580-10|Gillespie\_8526|Papaver\_hultenii

FCA185-09|Gillespie\_et\_al\_8481b|Papaver\_sp.  
 FCA417-10|Gillespie\_6628|Papaver\_dahlianum  
 FCA423-10|Gillespie\_6955-1|Papaver\_dahlianum  
 FCA456-10|Gillespie\_et\_al\_7292-2|Papaver\_cornwallisense  
 FCA217-09|Bosquet\_12|Papaver\_dahlianum  
 FCA415-10|Gillespie\_6601-1|Papaver\_dahlianum  
 FCA2797-11|Gillespie\_9854\_CAN|Papaver\_lapponicum\_ssp\_occidentale  
 FCA186-09|Gillespie\_et\_al\_8482|Papaver\_sp.  
 FCA2795-11|Gillespie\_9850\_CAN|Papaver\_hultenii  
 FCA2779-11|Gillespie\_9828\_CAN|Papaver\_hultenii

3.0E-4
