# Supplementary material for: DNA Barcoding the Canadian Arctic Flora: Core Plastid Barcodes (rbcL + matK) for 490 Vascular Plant Species
Source: PubMed Central journal article supplement (PMC3865322; doi:10.1371/journal.pone.0077982), 2013-10-22
Supplement: pone.0077982.s044.pdf [file pone.0077982.s044.pdf]

(A) rbcL

Polygonaceae

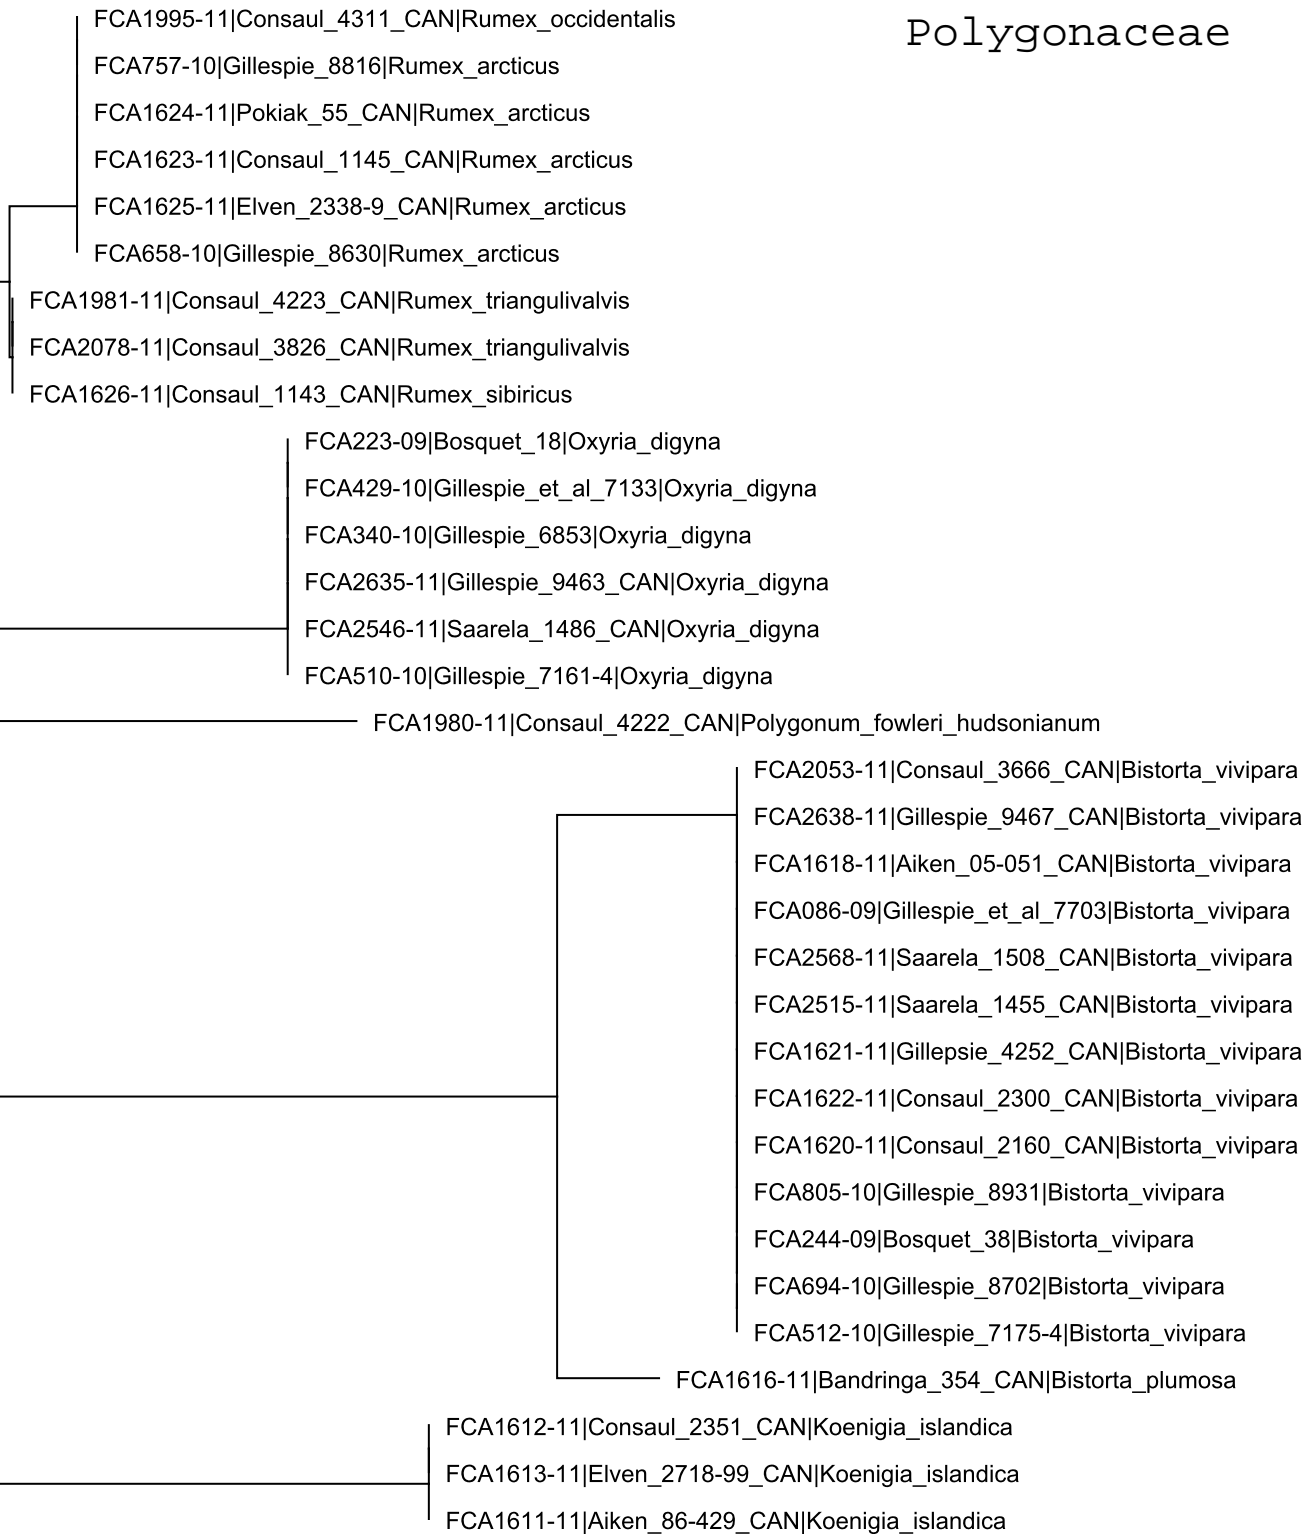

0.0050

Polygonaceae

(B) matK

FCA1617-11|Elven\_2076-9\_CAN|Bistorta\_plumosa  
FCA1616-11|Bandringa\_354\_CAN|Bistorta\_plumosa  
FCA805-10|Gillespie\_8931|Bistorta\_vivipara  
FCA2053-11|Consaul\_3666\_CAN|Bistorta\_vivipara  
FCA1621-11|Gillepsie\_4252\_CAN|Bistorta\_vivipara  
FCA2638-11|Gillespie\_9467\_CAN|Bistorta\_vivipara  
FCA512-10|Gillespie\_7175-4|Bistorta\_vivipara  
FCA1618-11|Aiken\_05-051\_CAN|Bistorta\_vivipara  
FCA1619-11|Consaul\_2248\_CAN|Bistorta\_vivipara  
FCA244-09|Bosquet\_38|Bistorta\_vivipara  
FCA2568-11|Saarela\_1508\_CAN|Bistorta\_vivipara  
FCA086-09|Gillespie\_et\_al\_7703|Bistorta\_vivipara  
FCA2515-11|Saarela\_1455\_CAN|Bistorta\_vivipara

FCA1624-11|Pokiak\_55\_CAN|Rumex\_arcticus  
FCA1625-11|Elven\_2338-9\_CAN|Rumex\_arcticus  
FCA1995-11|Consaul\_4311\_CAN|Rumex\_occidentalis  
FCA1626-11|Consaul\_1143\_CAN|Rumex\_sibiricus  
FCA2078-11|Consaul\_3826\_CAN|Rumex\_triangulivalvis  
FCA1981-11|Consaul\_4223\_CAN|Rumex\_triangulivalvis

FCA019-09|Gillespie\_et\_al\_7473|Oxyria\_digyna  
FCA1615-11|Gillespie\_4246\_CAN|Oxyria\_digyna  
FCA1614-11|Gillespie\_6703\_CAN|Oxyria\_digyna  
FCA510-10|Gillespie\_7161-4|Oxyria\_digyna  
FCA223-09|Bosquet\_18|Oxyria\_digyna  
FCA2546-11|Saarela\_1486\_CAN|Oxyria\_digyna  
FCA340-10|Gillespie\_6853|Oxyria\_digyna  
FCA2635-11|Gillespie\_9463\_CAN|Oxyria\_digyna

FCA1611-11|Aiken\_86-429\_CAN|Koenigia\_islandica  
FCA1613-11|Elven\_2718-99\_CAN|Koenigia\_islandica  
FCA1612-11|Consaul\_2351\_CAN|Koenigia\_islandica

0.02

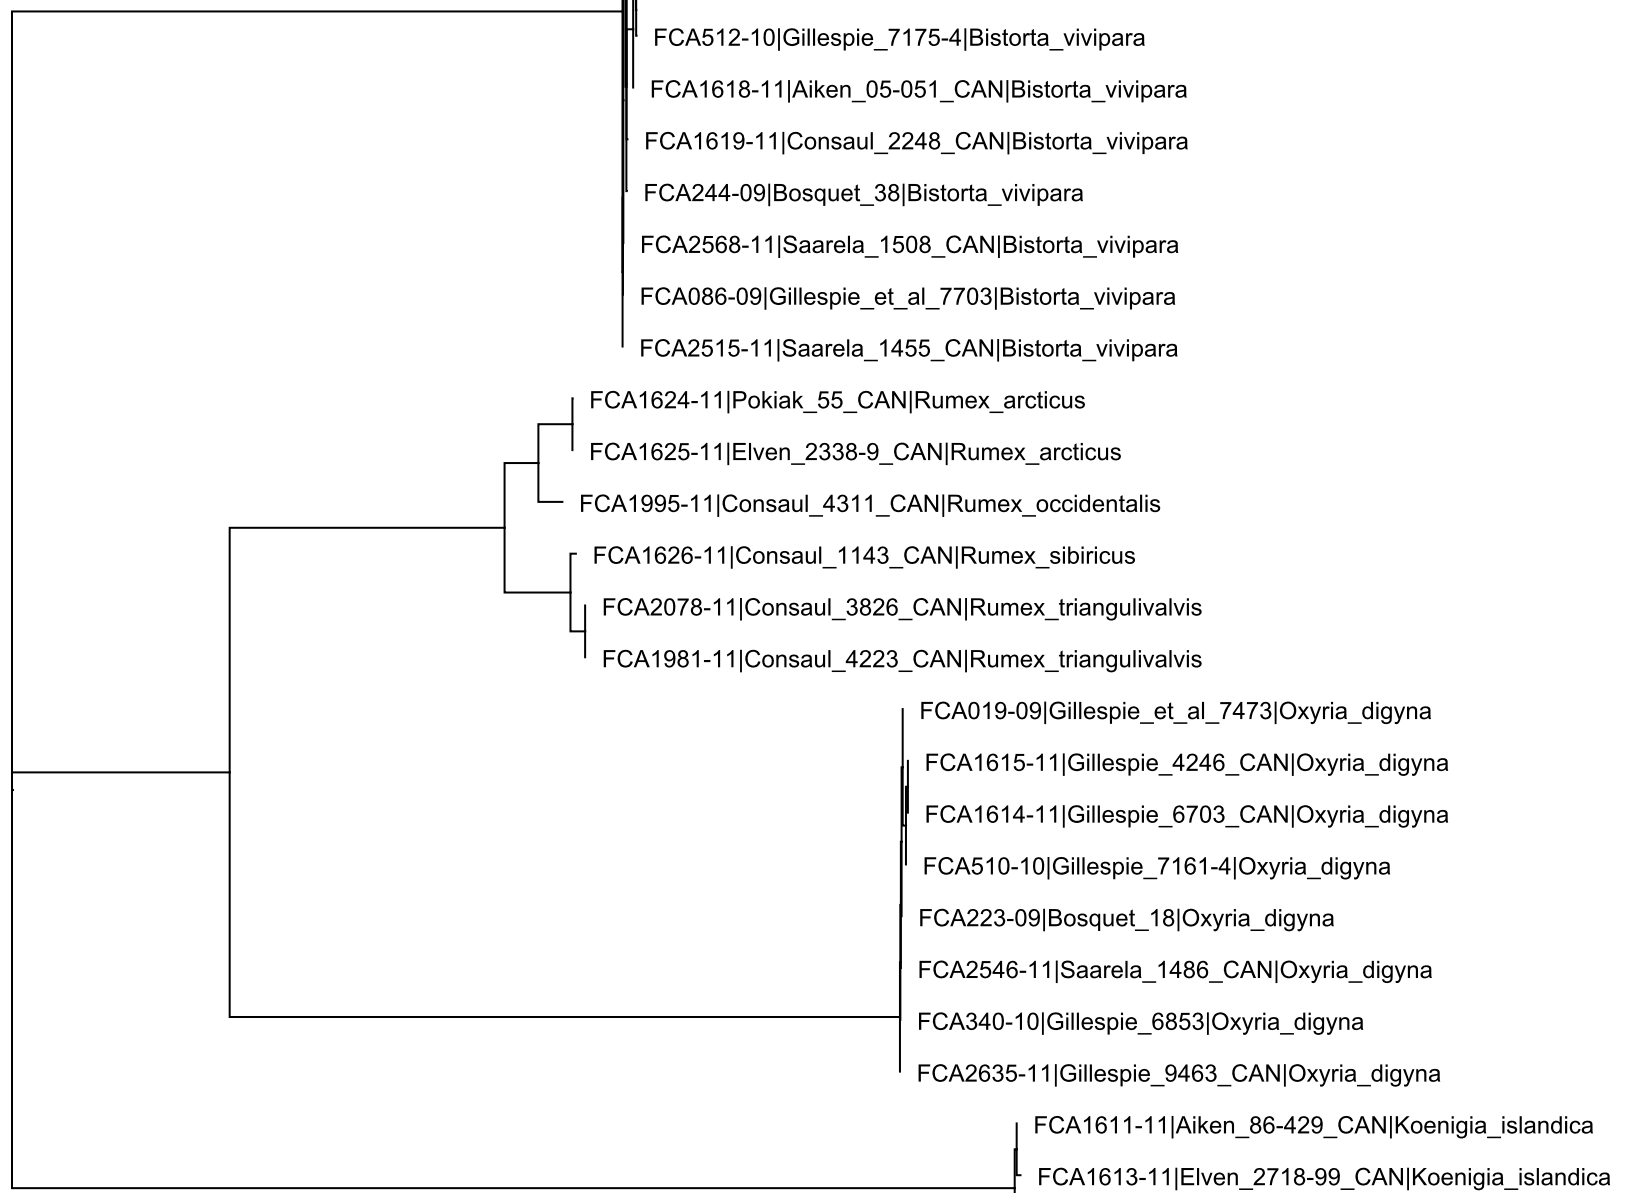

Polygonaceae (C) rbcL + matK

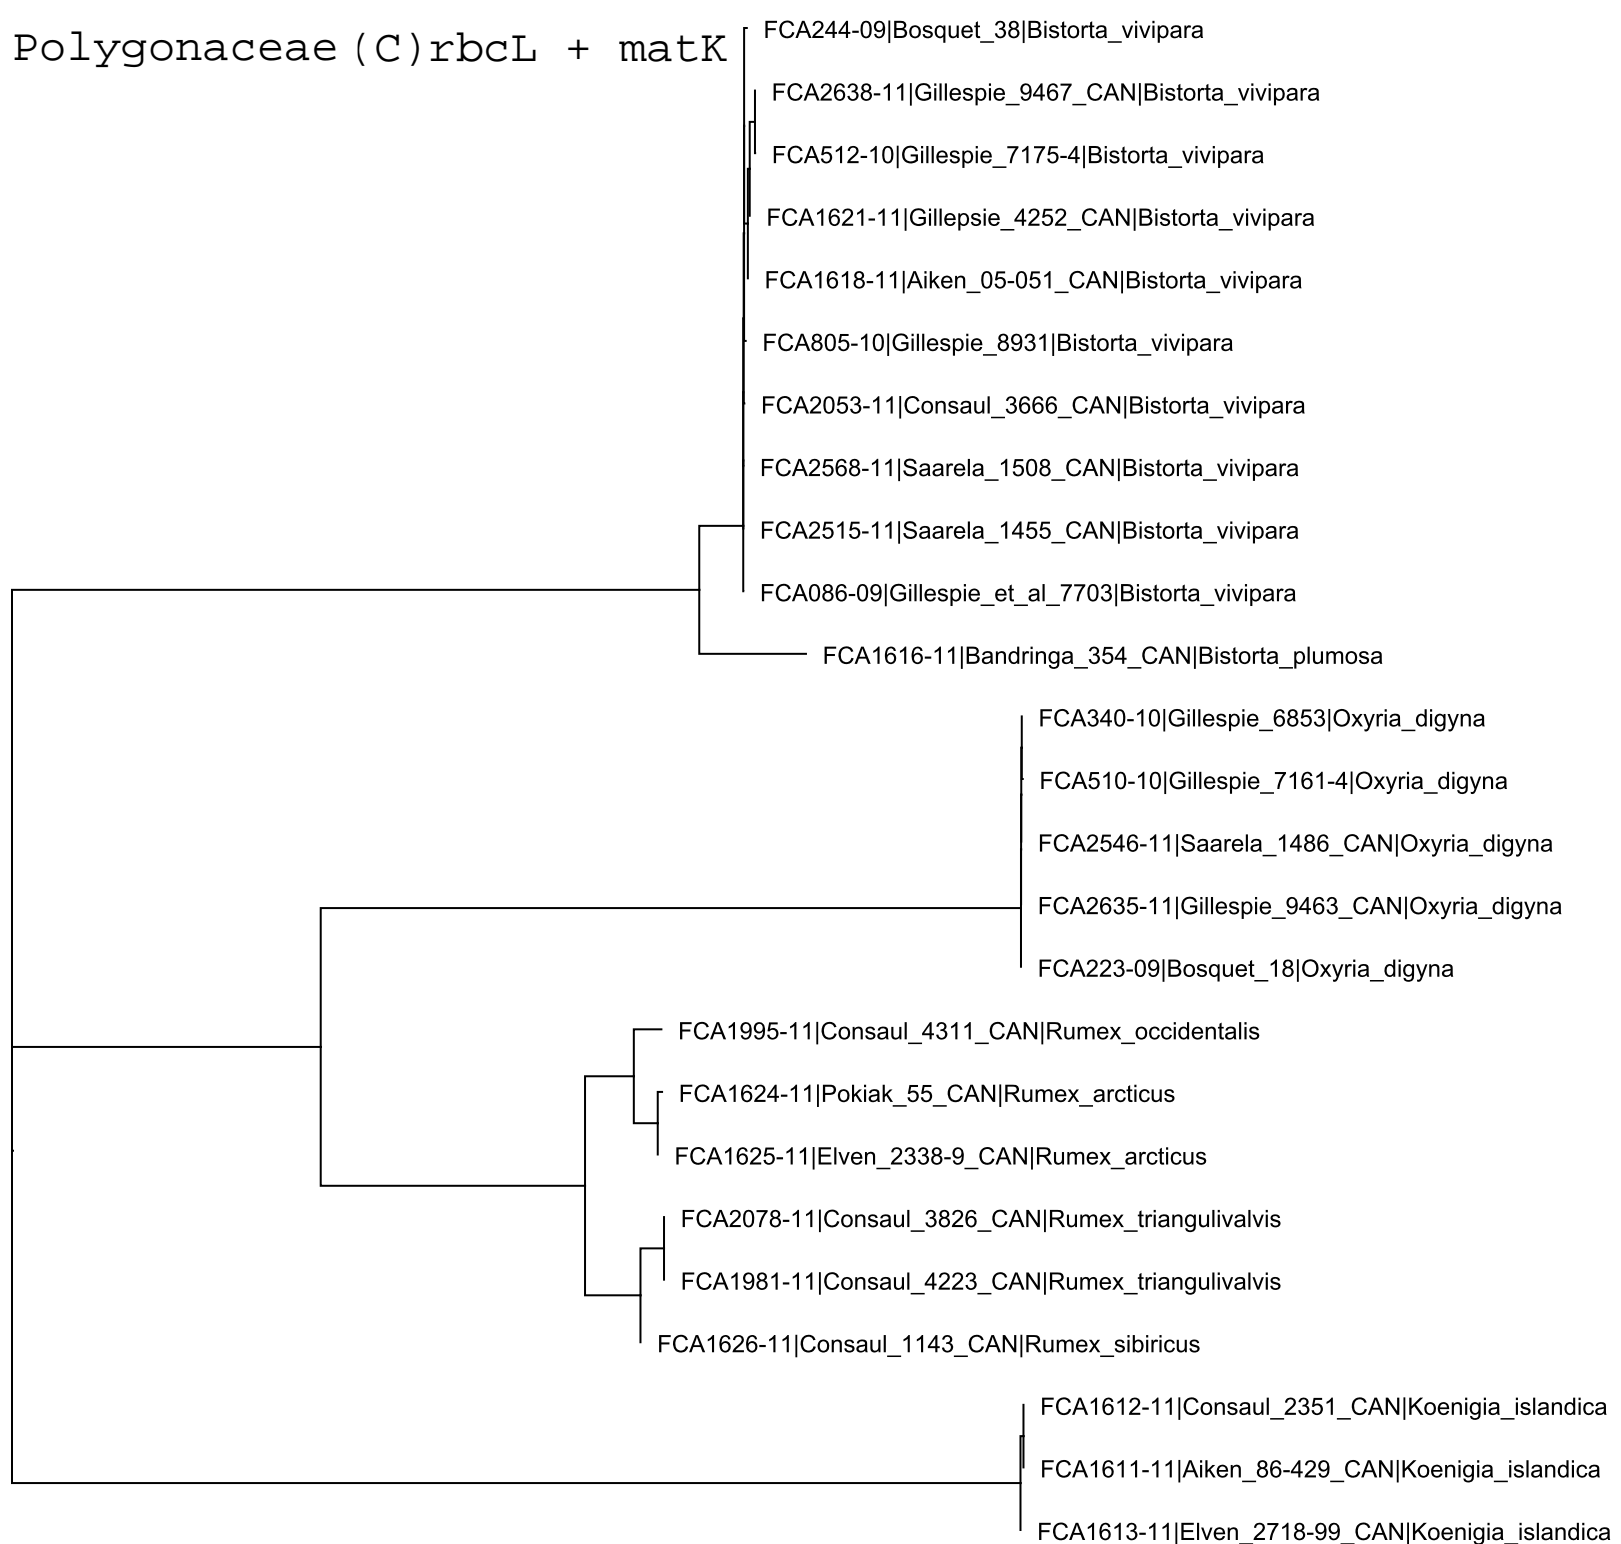

0.0080
