# Supplementary material for: DNA Barcoding the Canadian Arctic Flora: Core Plastid Barcodes (rbcL + matK) for 490 Vascular Plant Species
Source: PubMed Central journal article supplement (PMC3865322; doi:10.1371/journal.pone.0077982), 2013-10-22
Supplement: pone.0077982.s046.pdf [file pone.0077982.s046.pdf]

# Primulaceae (A) rbcL

FCA2983-11|Gillespie\_7200\_CAN|Androsace\_chamaejasme\_ssp\_andersonii  
 FCA721-10|Gillespie\_8744|Androsace\_chamaejasme\_ssp\_andersonii  
 FCA2420-11|Harris\_3648\_CAN|Androsace\_chamaejasme\_ssp\_andersonii  
 FCA589-10|Gillespie\_8537|Androsace\_chamaejasme\_ssp\_andersonii  
 FCA2719-11|Gillespie\_9716\_CAN|Androsace\_chamaejasme\_ssp\_andersonii  
 FCA067-09|Gillespie\_et\_al\_7622|Androsace\_chamaejasme\_ssp\_andersonii  
 FCA2419-11|Elven\_2292-9\_CAN|Androsace\_chamaejasme\_ssp\_andersonii  
 FCA2421-11|Elven\_2403-9\_CAN|Androsace\_chamaejasme\_ssp\_andersonii  
 FCA2498-11|Saarela\_1438\_CAN|Androsace\_chamaejasme\_ssp\_andersonii

FCA039-09|Gillespie\_et\_al\_7524|Androsace\_septentrionalis  
 FCA2286-11|Aikne\_99-052\_CAN|Androsace\_septentrionalis  
 FCA2533-11|Saarela\_1473\_CAN|Androsace\_septentrionalis  
 FCA2067-11|Consaul\_3712\_CAN|Androsace\_septentrionalis  
 FCA778-10|Gillespie\_8855|Androsace\_septentrionalis  
 FCA2157-11|Gillespie\_5947\_CAN|Androsace\_septentrionalis  
 FCA2857-11|Gillespie\_9986\_CAN|Androsace\_septentrionalis  
 FCA2156-11|Tremblay\_82-2004\_CAN|Androsace\_septentrionalis

FCA2345-11|Bennett\_06-584\_CAN|Douglasia\_arctica

FCA2159-11|Harris\_3683\_CAN|Primula\_stricta  
 FCA2158-11|Elven\_2336-9\_CAN|Primula\_borealis  
 FCA1695-11|Consaul\_974\_CAN|Primula\_borealis

FCA791-10|Gillespie\_8905|Primula\_stricta  
 FCA2287-11|Bennett\_08-191\_CAN|Primula\_egalikensis  
 FCA622-10|Gillespie\_8574|Primula\_stricta  
 FCA2101-11|Consaul\_3831\_CAN|Primula\_stricta  
 FCA2093-11|Consaul\_3815\_CAN|Primula\_egalikensis  
 FCA2434-11|Brunton\_10716\_CAN|Primula\_stricta  
 FCA087-09|Gillespie\_et\_al\_7709|Primula\_stricta

0.0040

Primulaceae (B)matK

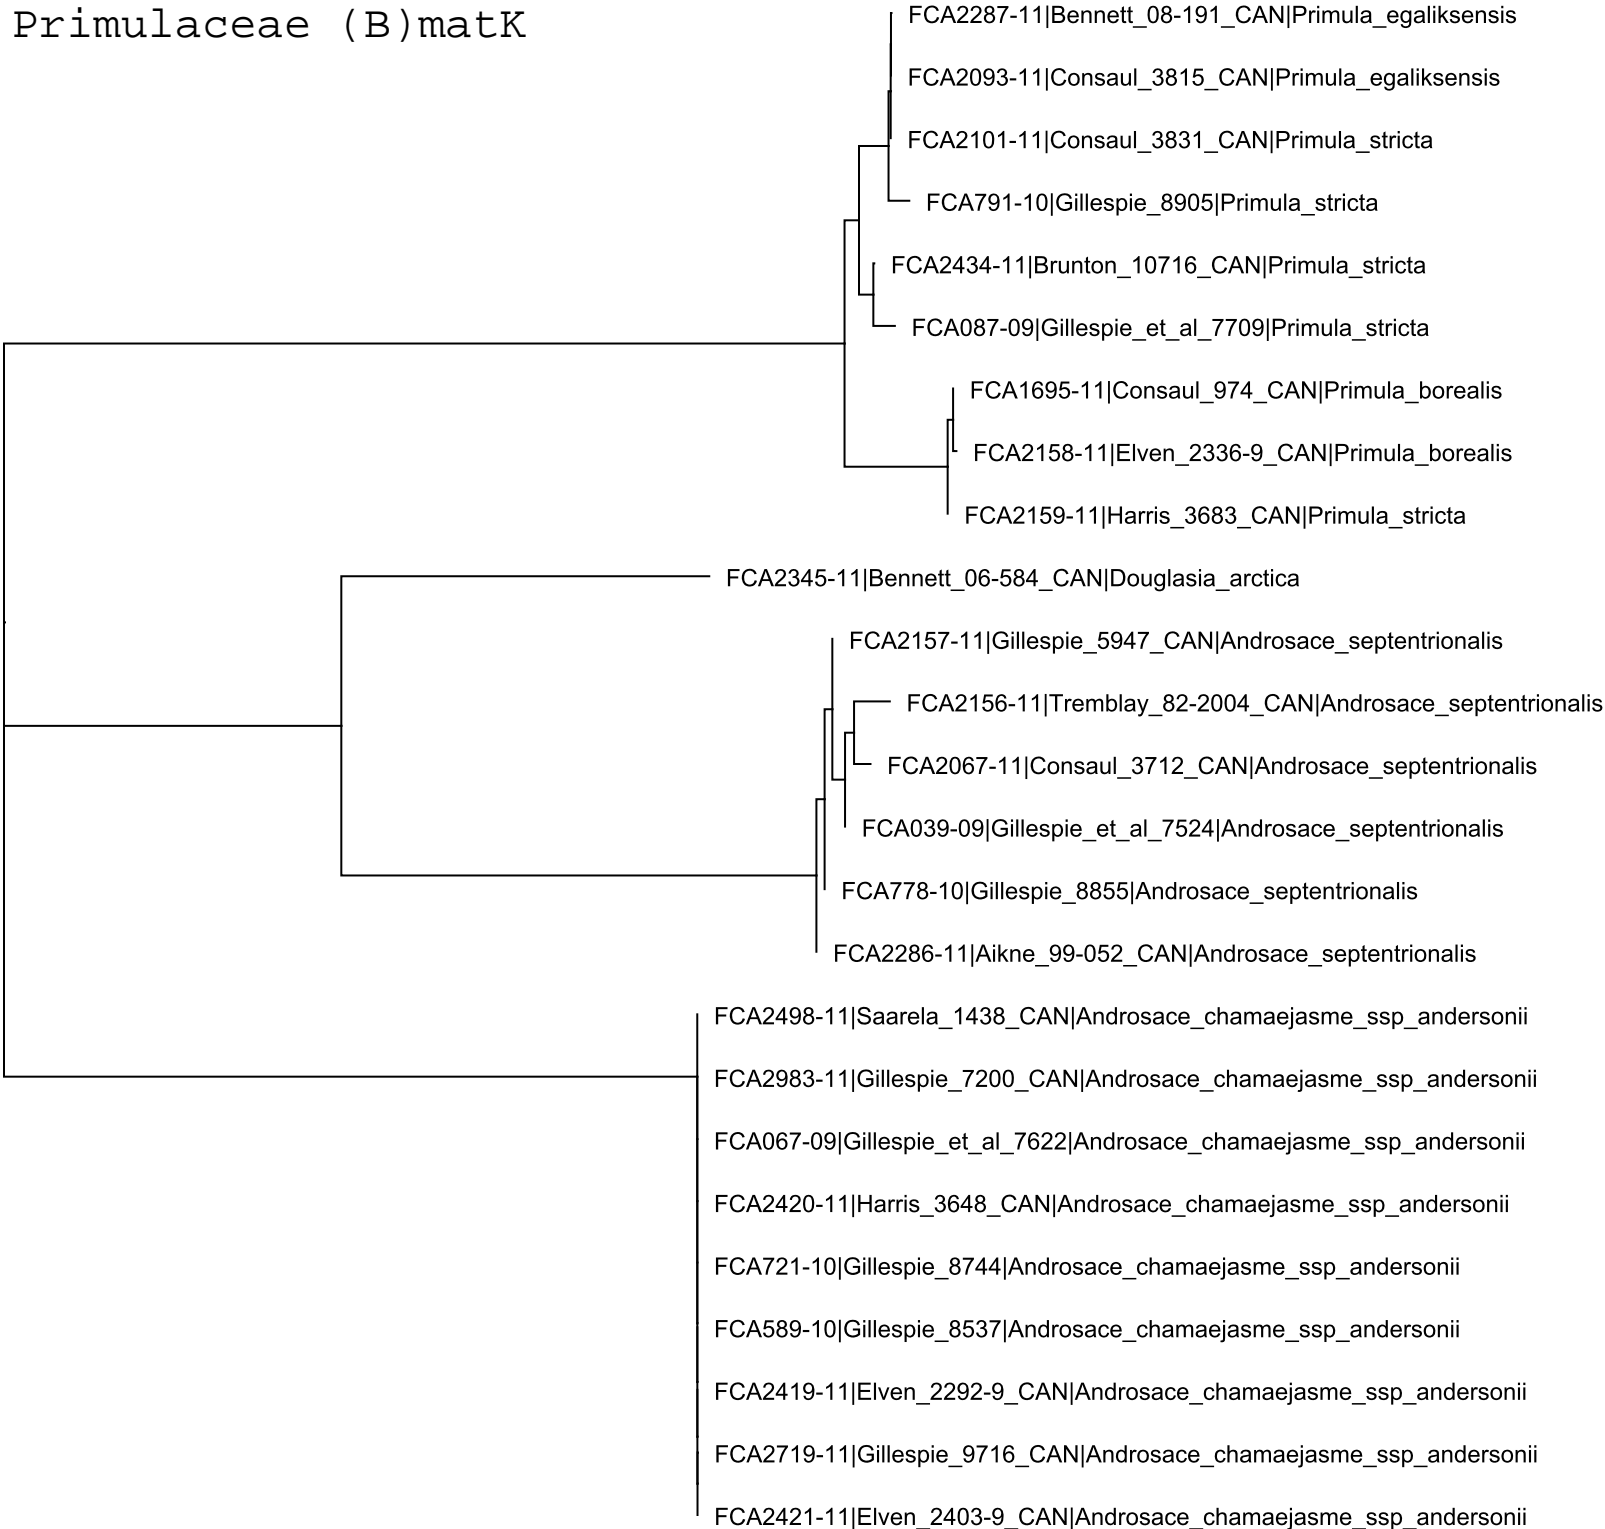

0.01

Primulaceae (C)rbcL + matK

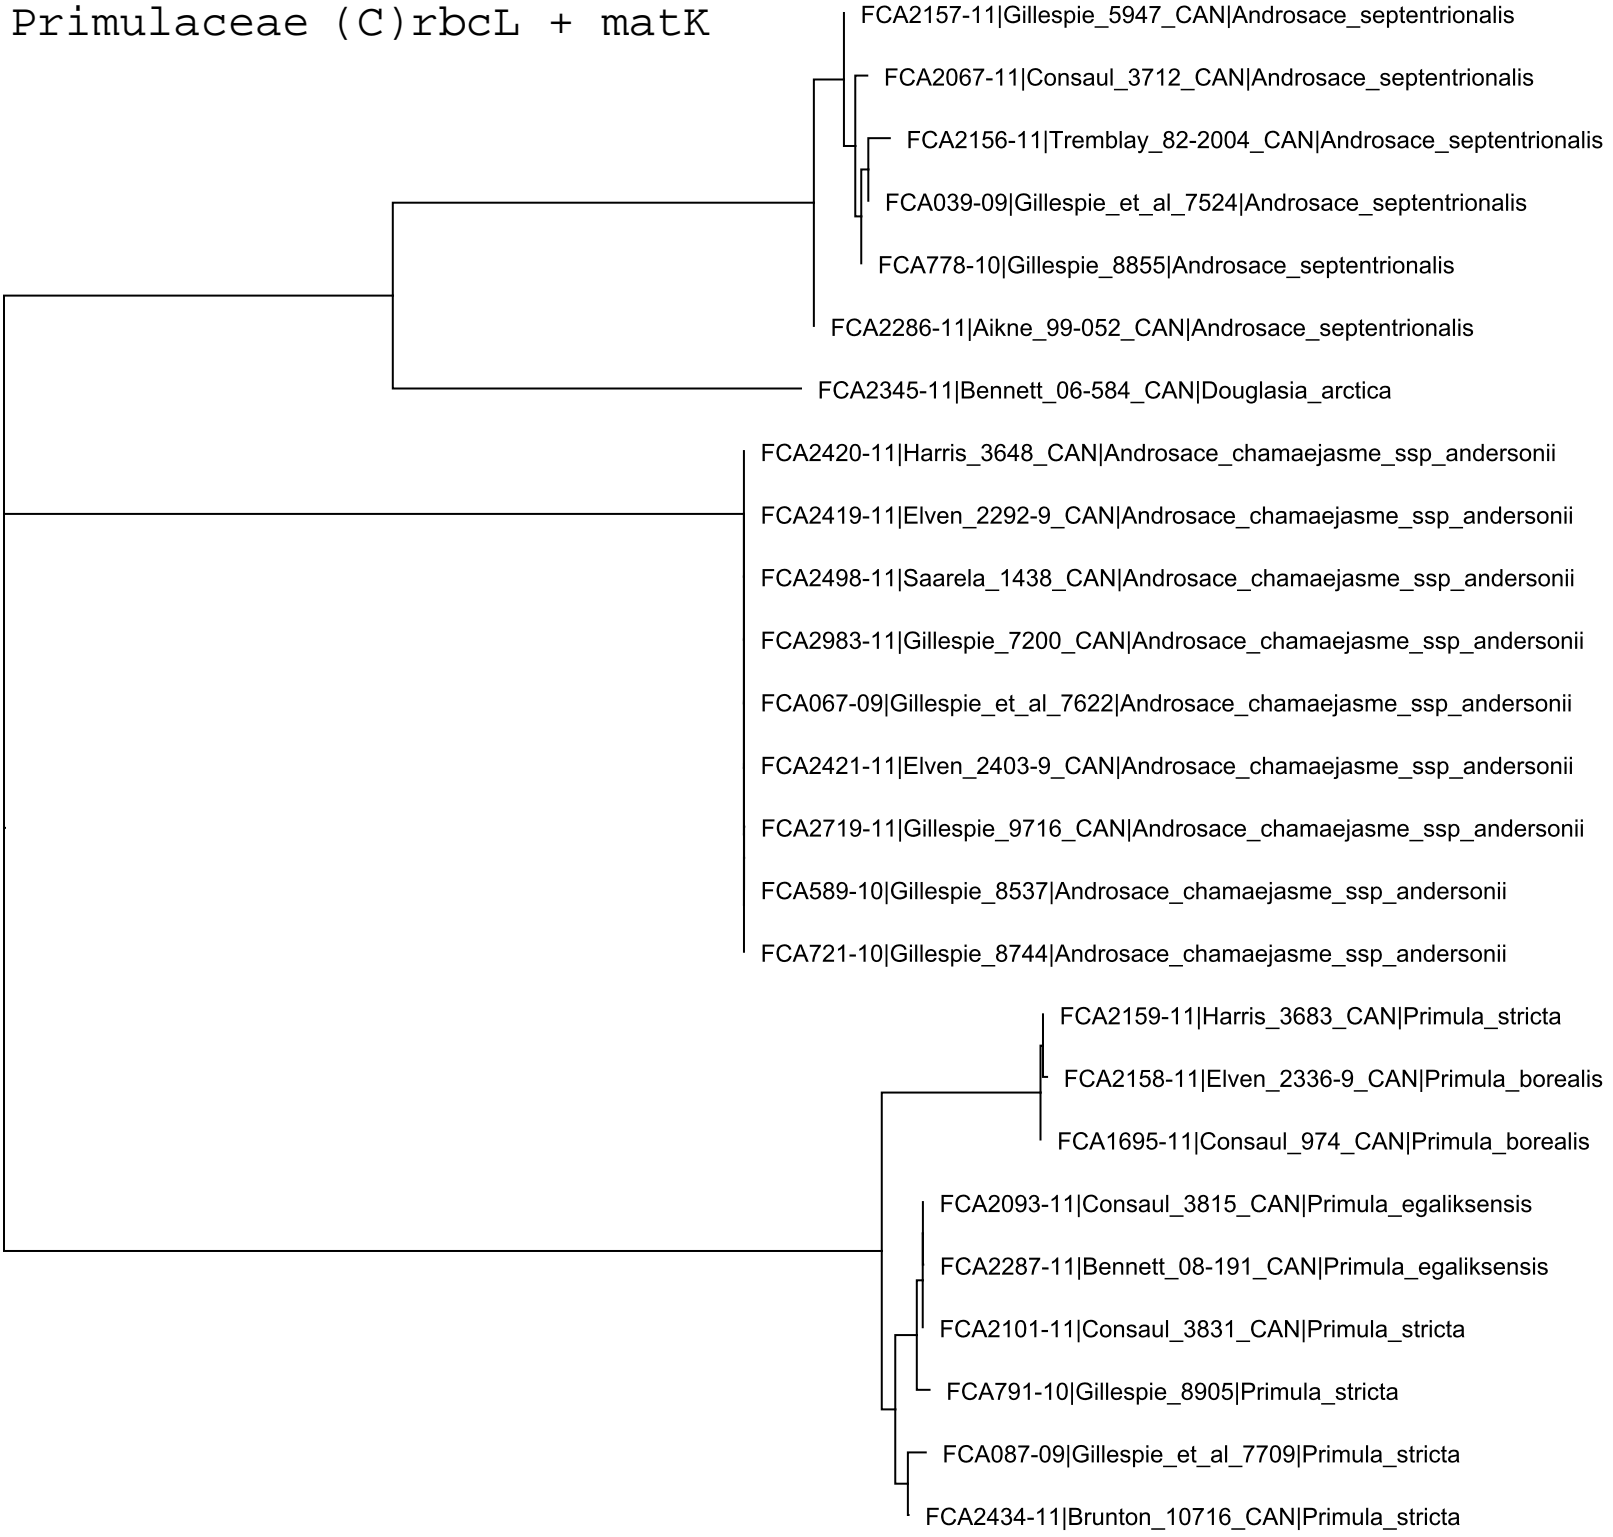

0.0070
