# Supplementary material for: DNA Barcoding the Canadian Arctic Flora: Core Plastid Barcodes (rbcL + matK) for 490 Vascular Plant Species
Source: PubMed Central journal article supplement (PMC3865322; doi:10.1371/journal.pone.0077982), 2013-10-22
Supplement: pone.0077982.s055.pdf [file pone.0077982.s055.pdf]

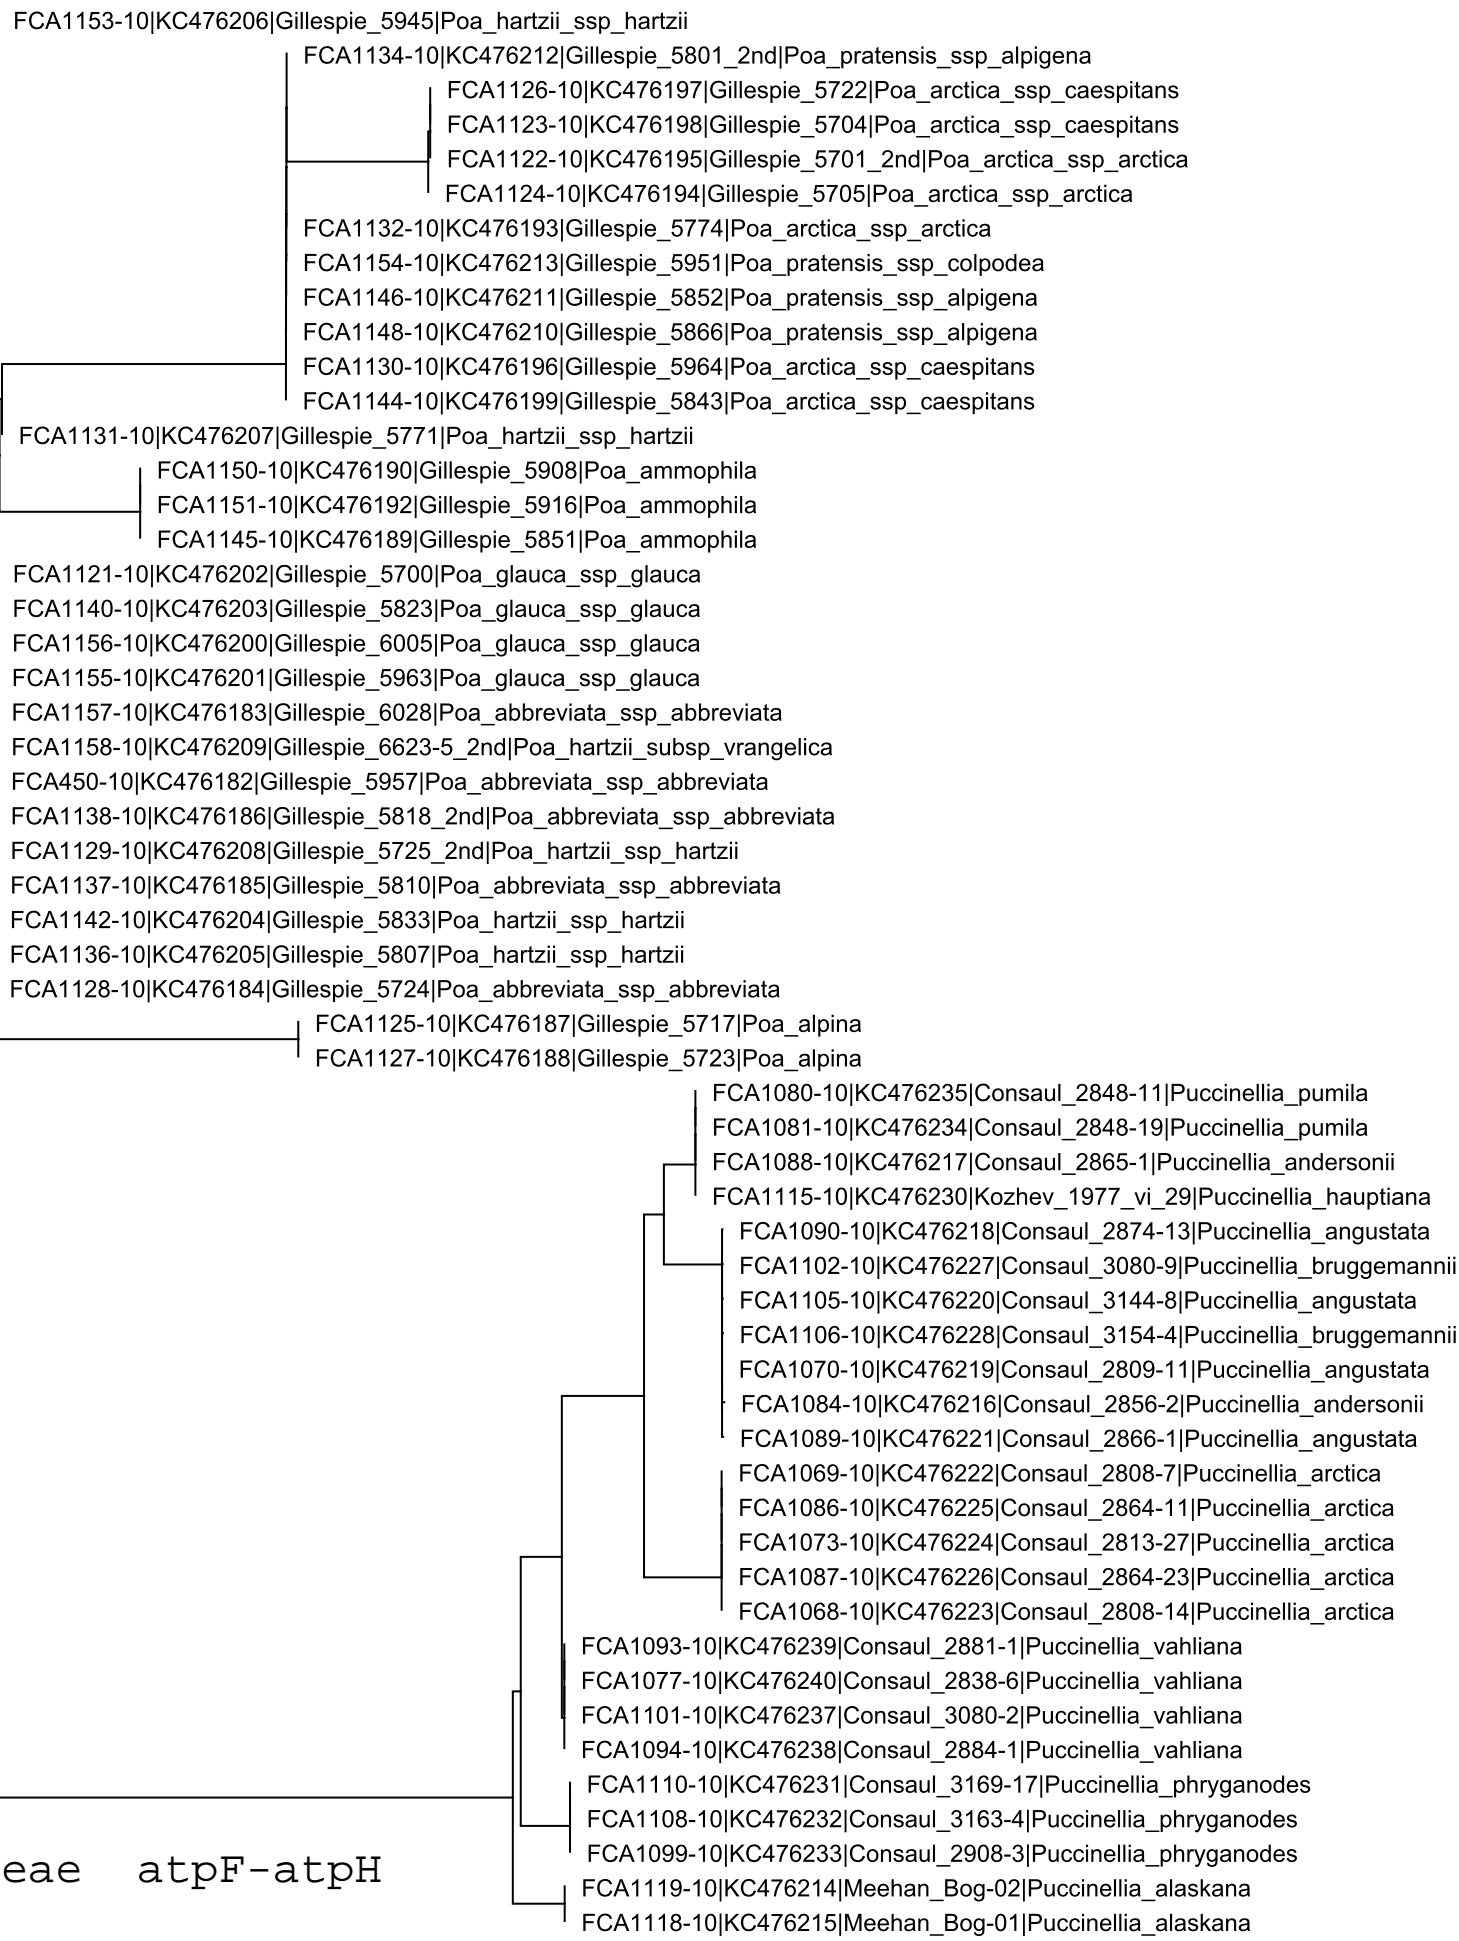

Poaceae atpF-atpH

0.0040
