# Supplementary material for: DNA Barcoding the Canadian Arctic Flora: Core Plastid Barcodes (rbcL + matK) for 490 Vascular Plant Species
Source: PubMed Central journal article supplement (PMC3865322; doi:10.1371/journal.pone.0077982), 2013-10-22
Supplement: pone.0077982.s061.pdf [file pone.0077982.s061.pdf]

Draba  
rbcL + matK

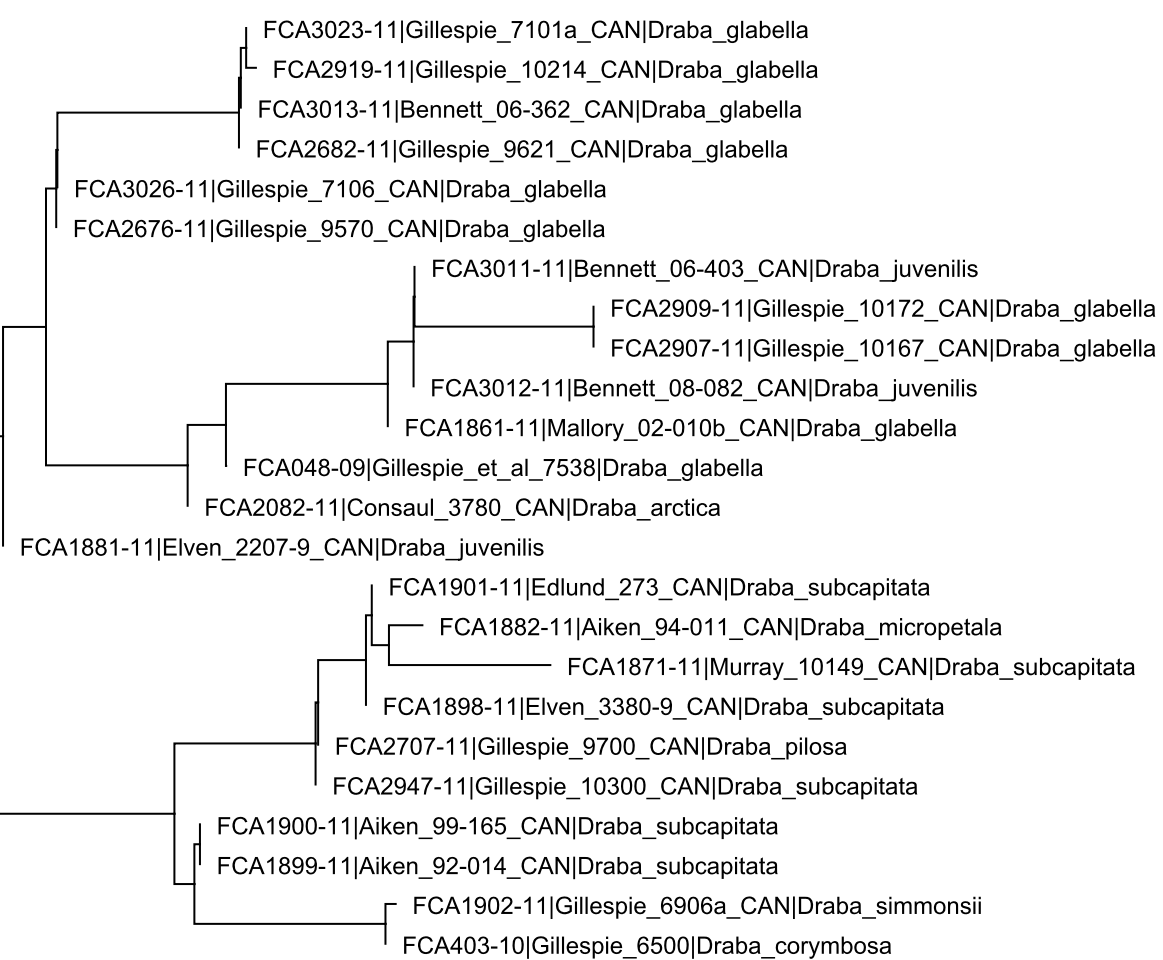

- FCA1843-11|Gillespie\_6705\_CAN|Draba\_alpina
- FCA1849-11|Murray\_10073\_CAN|Draba\_cinerea
- FCA1850-11|Gillespie\_7107\_CAN|Draba\_cinerea
- FCA1844-11|Elven\_2401-9\_CAN|Draba\_alpina
- FCA2025-11|Consaul\_3544\_CAN|Draba\_nivalis
- FCA1868-11|Eriksen\_983\_CAN|Draba\_oligosperma
- FCA028-09|Gillespie\_et\_al\_7497b|Draba\_pilosa
- FCA1885-11|Aiken\_93-048a\_CAN|Draba\_micropetala
- FCA1846-11|Elven\_3293-99\_CAN|Draba\_arctica
- FCA3017-11|Gillett\_18661\_CAN|Draba\_cinerea
- FCA1883-11|Gillespie\_6605\_CAN|Draba\_micropetala
- FCA044-09|Gillespie\_et\_al\_7531|Draba\_cinerea
- FCA1869-11|Elven\_2734-9\_CAN|Draba\_oblongata
- FCA1874-11|Aiken\_92-013\_CAN|Draba\_corymbosa
- FCA1847-11|Aiken\_93-056\_CAN|Draba\_arctica
- FCA1845-11|Murray\_10056\_CAN|Draba\_cinerea
- FCA1956-11|Consaul\_4077\_CAN|Draba\_cinerea
- FCA1872-11|Aiken\_98-048\_CAN|Draba\_corymbosa
- FCA358-10|Gillespie\_6926|Draba\_oblongata
- FCA2699-11|Gillespie\_9683\_CAN|Draba\_pilosa
- FCA2860-11|Gillespie\_9996\_CAN|Draba\_cinerea
- FCA2710-11|Gillespie\_9703\_CAN|Draba\_corymbosa
- FCA2713-11|Gillespie\_9706\_CAN|Draba\_corymbosa
- FCA2640-11|Gillespie\_9469\_CAN|Draba\_cinerea
- FCA3014-11|Brunton\_10589\_CAN|Draba\_glabella
- FCA2708-11|Gillespie\_9701\_CAN|Draba\_corymbosa
- FCA2702-11|Gillespie\_9687\_CAN|Draba\_corymbosa
- FCA2701-11|Gillespie\_9685\_CAN|Draba\_corymbosa
- FCA2743-11|Gillespie\_9754\_CAN|Draba\_pilosa
- FCA2709-11|Gillespie\_9702\_CAN|Draba\_corymbosa
- FCA2814-11|Gillespie\_9890\_CAN|Draba\_cinerea
- FCA2698-11|Gillespie\_9679\_CAN|Draba\_pilosa
- FCA3025-11|Gillespie\_6685b\_CAN|Draba\_corymbosa
- FCA3018-11|Gillespie\_6545\_CAN|Draba\_simmonsii
- FCA2539-11|Saarela\_1479\_CAN|Draba\_cinerea
- FCA3024-11|Gillespie\_6610\_CAN|Draba\_simmonsii
- FCA2808-11|Gillespie\_9870\_CAN|Draba\_corymbosa
- FCA2711-11|Gillespie\_9704\_CAN|Draba\_corymbosa
- FCA2859-11|Gillespie\_9994\_CAN|Draba\_corymbosa
- FCA3015-11|Bennett\_05-0730\_CAN|Draba\_cinerea
- FCA184-09|Gillespie\_et\_al\_8449|Draba\_simmonsii
- FCA2819-11|Gillespie\_9898\_CAN|Draba\_cinerea
- FCA1876-11|Harris\_3650\_CAN|Draba\_corymbosa
- FCA1866-11|Elven\_2779-9\_CAN|Draba\_pauciflora
- FCA2918-11|Gillespie\_10213\_CAN|Draba\_sp.
- FCA2791-11|Gillespie\_9843\_CAN|Draba\_corymbosa
- FCA2714-11|Gillespie\_9707\_CAN|Draba\_corymbosa
- FCA2864-11|Gillespie\_10012\_CAN|Draba\_corymbosa
- FCA165-09|Gillespie\_et\_al\_8178|Draba\_nivalis
- FCA1870-11|Aiken\_04-096\_CAN|Draba\_nivalis
- FCA113-09|Gillespie\_et\_al\_7825|Draba\_nivalis
- FCA3009-11|Brunton\_10751\_CAN|Draba\_nivalis
- FCA3019-11|Gillespie\_6661\_CAN|Draba\_nivalis
- FCA2485-11|Saarela\_1425\_CAN|Draba\_cinerea
- FCA2475-11|Saarela\_1415\_CAN|Draba\_cinerea
- FCA3016-11|Gillett\_18682\_CAN|Draba\_glabella
- FCA2942-11|Gillespie\_10276\_CAN|Draba\_oblongata
- FCA017-09|Gillespie\_et\_al\_7471|Draba\_corymbosa
- FCA104-09|Gillespie\_et\_al\_7783|Draba\_oblongata
- FCA2845-11|Gillespie\_9949\_CAN|Draba\_corymbosa
- FCA1879-11|Edlund\_31\_CAN|Draba\_lactea
- FCA1903-11|Elven\_3125-9\_CAN|Draba\_lactea
- FCA1880-11|Elven\_2455-9\_CAN|Draba\_lactea
- FCA3022-11|Gillespie\_6706\_CAN|Draba\_lactea
- FCA3010-11|Bennett\_05-1086\_CAN|Draba\_lactea
- FCA2744-11|Gillespie\_9755\_CAN|Draba\_lactea
- FCA2785-11|Gillespie\_9834\_CAN|Draba\_corymbosa
- FCA3021-11|Gillespie\_7213\_CAN|Draba\_lactea
- FCA2874-11|Gillespie\_10059\_CAN|Draba\_corymbosa
- FCA2873-11|Gillespie\_10058\_CAN|Draba\_corymbosa
- FCA2886-11|Gillespie\_10081\_CAN|Draba\_cinerea
- FCA2861-11|Gillespie\_9997\_CAN|Draba\_cinerea
- FCA2072-11|Consaul\_3719\_CAN|Draba\_norvegica
- FCA3020-11|Aiken\_02-009a\_CAN|Draba\_nivalis
- FCA1841-11|Gillespie\_7229\_CAN|Draba\_alpina

7.0E-4
